1                   **Nucleocapsid mutations in SARS-CoV-2 augment replication and pathogenesis.**

2  
3  
4  
5                   Bryan A. Johnson<sup>1</sup>, Yiyang Zhou<sup>2</sup>, Kumari G. Lokugamage<sup>1</sup>, Michelle N. Vu<sup>1</sup>, Nathen Bopp<sup>3</sup>,  
6                   Patricia A. Crocquet-Valdes<sup>3</sup>, Birte Kalveram<sup>1</sup>, Craig Schindewolf<sup>1</sup>, Yang Liu<sup>2</sup>, Dionna  
7                   Scharton<sup>1,5</sup>, Jessica A. Plante<sup>1,5</sup>, Xuping Xie<sup>2</sup>, Patricia Aguilar<sup>3,6</sup>, Scott C. Weaver<sup>1,4,5,6</sup>, Pei-  
8                   Yong Shi<sup>2,4,5,6,7</sup>, David H. Walker<sup>3,6</sup>, Andrew L. Routh<sup>2,4</sup>, Kenneth S. Plante<sup>1,5</sup>, Vineet D.  
9                   Menachery<sup>1,4,6\*</sup>

10  
11                   <sup>1</sup>Department of Microbiology and Immunology, University of Texas Medical Branch; Galveston,  
12                   Texas, United States of America

13  
14                   <sup>2</sup>Department of Biochemistry and Molecular Biology, University of Texas Medical Branch;  
15                   Galveston, Texas, United States of America

16  
17                   <sup>3</sup>Department of Pathology, University of Texas Medical Branch; Galveston, Texas, United States  
18                   of America

19  
20                   <sup>4</sup>Institute for Human Infection and Immunity, University of Texas Medical Branch; Galveston,  
21                   Texas, United States of America

22  
23                   <sup>5</sup>World Reference Center of Emerging Viruses and Arboviruses, University of Texas Medical  
24                   Branch; Galveston, Texas, United States of America

25  
26                   <sup>6</sup>Center for Biodefense and Emerging Infectious Diseases, University of Texas Medical Branch;  
27                   Galveston, Texas, United States of America

28  
29                   <sup>7</sup>Institute for Drug Discovery, University of Texas Medical Branch; Galveston, Texas, United  
30                   States of America

31  
32                   \*Corresponding author.

33                   Email: [Vimenach@utmb.edu](mailto:Vimenach@utmb.edu) (VDM)

35 **Abstract**

36 While SARS-CoV-2 continues to adapt for human infection and transmission, genetic variation  
37 outside of the spike gene remains largely unexplored. This study investigates a highly variable  
38 region at residues 203-205 in the SARS-CoV-2 nucleocapsid protein. Recreating a mutation  
39 found in the alpha and omicron variants in an early pandemic (WA-1) background, we find that  
40 the R203K+G204R mutation is sufficient to enhance replication, fitness, and pathogenesis of  
41 SARS-CoV-2. The R203K+G204R mutant corresponds with increased viral RNA and protein  
42 both *in vitro* and *in vivo*. Importantly, the R203K+G204R mutation increases nucleocapsid  
43 phosphorylation and confers resistance to inhibition of the GSK-3 kinase, providing a molecular  
44 basis for increased virus replication. Notably, analogous alanine substitutions at positions  
45 203+204 also increase SARS-CoV-2 replication and augment phosphorylation, suggesting that  
46 infection is enhanced through ablation of the ancestral 'RG' motif. Overall, these results  
47 demonstrate that variant mutations outside spike are key components in SARS-CoV-2's  
48 continued adaptation to human infection.

49

50 **Author Summary**

51 Since its emergence, SARS-CoV-2 has continued to adapt for human infection resulting in the  
52 emergence of variants with unique genetic profiles. Most studies of genetic variation have  
53 focused on spike, the target of currently available vaccines, leaving the importance of variation  
54 elsewhere understudied. Here, we characterize a highly variable motif at residues 203-205 in  
55 nucleocapsid. Recreating the prominent nucleocapsid R203K+G204R mutation in an early  
56 pandemic background, we show that this mutation is alone sufficient to enhance SARS-CoV-2  
57 replication and pathogenesis. We also link augmentation of SARS-CoV-2 infection by the  
58 R203K+G204R mutation to its modulation of nucleocapsid phosphorylation. Finally, we  
59 characterize an analogous alanine double substitution at positions 203-204. This mutant was  
60 found to mimic R203K+G204R, suggesting augmentation of infection occurs by disrupting the  
61 ancestral sequence. Together, our findings illustrate that mutations outside of spike are key  
62 components of SARS-CoV-2's adaptation to human infection.

63

## 64 Introduction

65 The emergence of severe acute respiratory syndrome coronavirus 2 (SARS)-CoV-2 is the most  
66 significant infectious disease event of the 21st century (1, 2). Since its initial expansion, SARS-  
67 CoV-2 has continued to adapt for human infection and transmission, resulting in several variants  
68 of concern(3). While most mutations occur within a single lineage, a small number are shared  
69 across multiple variants (4). Spike mutations have dominated SARS-CoV-2 variant research,  
70 owing to concerns that they enhance replication, augment transmission, or allow escape from  
71 immunity (4). However, less attention has been focused on mutations outside spike, despite the  
72 existence of other “mutational hotspots” in the genome (4). The SARS-CoV-2 nucleocapsid (N)  
73 gene is one hotspot for coding mutations, particularly at amino acid residues 203-205 within its  
74 serine rich (SR) domain (5). Three prominent mutations occur in this region including  
75 R203K+G204R, a double substitution (KR mt) present in the alpha, gamma, and omicron  
76 variants; T205I present in the beta variant; and R203M that occurs in the kappa and delta  
77 variants (6, 7). Together, this genetic variation and convergent evolution in residues 203-205  
78 suggests positive selection in this motif of N.

79 Here, we utilize our reverse genetic system (8, 9) to generate the KR nucleocapsid  
80 mutation in the ancestral WA-1 strain of SARS-CoV-2. This change alone was sufficient to  
81 increase viral replication in respiratory cells and exhibited enhanced fitness in direct competition  
82 studies with wild type (WT) SARS-CoV-2. In the hamster model, the KR mutant (mt) enhanced  
83 pathogenesis and outcompeted WT in direct competition. We subsequently found that the KR  
84 mt corresponds with increased viral RNA both *in vitro* and *in vivo*. Notably, we observed that the  
85 KR mt resulted in augmented nucleocapsid phosphorylation relative to WT SARS-CoV-2; similar  
86 increases in N phosphorylation were also seen in the alpha and kappa variants. Importantly, the  
87 KR mt was more resistant to GSK-3 kinase inhibition relative to WT SARS-CoV-2, suggesting  
88 that the KR mt alters interactions with N targeting kinases. Finally, an analogous alanine double  
89 substitution mutant at position 203+204 (AA mt) also increased fitness and altered

90 phosphorylation relative to WT SARS-CoV-2. Together, these results suggest that disruption of  
91 the ancestral “RG” motif in nucleocapsid augments infection, fitness, and pathogenesis of  
92 SARS-CoV-2.

## 93 Results

### 94 Genetic Analysis of a highly variable motif of SARS-CoV-2 Nucleocapsid.

95 Using SARS-CoV-2 genomic data from the GISAID database(6), we binned each sequence by  
96 month of collection and performed an *in silico* search for variation at residues 203-205 within  
97 nucleocapsid (**Fig 1A**). Three prominent mutations emerged from this analysis. The first is the  
98 R203K+G204R double substitution (KR mt), present in the alpha, gamma, and omicron variants  
99 (**Fig 1D**). Historically, the KR mt has been the most abundant mutation in this region, emerging  
100 early in the pandemic and reaching 73% of reported sequences in April 2021 (**Fig 1A, S1**  
101 **Table**). The second prominent mutation, T205I, is present in the beta, eta, and mu lineages (**Fig**  
102 **1D**). While also emerging early in the pandemic, T205I is a minority variant which peaked at 9%  
103 in February 2021 (**Fig 1A, S1 Table**). The third prominent variant mutation is R203M, present in  
104 the delta and kappa variants (**Fig 1D**). Interestingly, while the R203M mutation was first  
105 detected in March 2020, it persisted as a rare (<1%) variant until April 2021 when it began  
106 expanding rapidly, reaching 97% of all reported sequences by November 2021, displacing the  
107 KR and T205I mutations (**Fig 1A, S1 Table**). However, with the recent emergence of the  
108 omicron variant, the KR mt has regained prominence, displacing R203M as the most common  
109 mutation and reaching 93% of all newly reported sequences in January 2022. Together, these  
110 data reveal a complex pattern of genetic variation and convergent evolution for residues 203-  
111 205 of SARS-CoV-2 N.

112 To determine if mutations in this variable motif have the potential to enhance infection,  
113 we evaluated the replication kinetics of SARS-CoV-2 variants. Two cell models were selected  
114 for this analysis: Vero E6 (commonly used for propagation and titration of SARS-CoV-2) and  
115 Calu-3 2b4 (a respiratory cell line used to study coronavirus and influenza infection) (10, 11).  
116 Briefly, Vero E6 or Calu-3 2b4 cells were inoculated at a low multiplicity of infection (MOI) of  
117 0.01 plaque forming units/cell with the early pandemic Washington-1 (WA-1) strain or a SARS-

118 CoV-2 variant and replication kinetics monitored for 48 hours post infection (hpi). In Vero E6  
119 cells, while the alpha and beta variants replicated to equivalent endpoint titers compared to WA-  
120 1, both variants had slightly lower titers at 24 hpi (**Fig 1B, S1A Fig**). In contrast, the kappa  
121 variant replicated to ~15-fold lower titer than WA-1 throughout infection (**S1A Fig**), potentially  
122 due to processing mutations in SARS-CoV-2 spike shared with the delta variant (12).  
123 Interestingly, in Calu-3 2b4 cells, the alpha variant replicated to a 5.6 fold higher endpoint titer  
124 compared to WA-1 (**Fig 1C**). In contrast, the beta variant replicated to a lower (2.7 fold) mean  
125 endpoint titer compared to WA-1 while the kappa variant showed no significant differences with  
126 WA-1 (**S1B Fig**). Together, these data suggest that SARS-CoV-2 variants harboring N  
127 mutations may correspond to altered replication kinetics.

#### 128 **The KR and R203M mts alone are sufficient to increase viral replication.**

129 Because the alpha variant exhibited enhanced replication in Calu-3 2b4 cells, we selected the  
130 KR mt for further examination. To study the effects of the KR mt in isolation, we utilized a  
131 SARS-CoV-2 reverse genetic system to recreate the KR mt in a WA-1 background (**Fig 1E**) (8,  
132 9). In addition, due to gain-of-function concerns, the accessory protein ORF7 was replaced with  
133 mNeonGreen (mNG), which reduces but does not eliminate disease in golden Syrian hamsters  
134 (**S2 Fig**). After recovery of recombinant virus, we evaluated the KR mt's effects on SARS-CoV-2  
135 replication. Both Vero E6 and Calu-3 2b4 cells were infected at a low MOI (0.01) with either  
136 SARS-CoV-2 WA-1 harboring the mNG reporter (herein referred to as WT) or the KR mt and  
137 viral titer monitored for 48 hpi. Like the alpha variant, the KR mt grew to a lower titer at 24 hpi,  
138 but had an equivalent endpoint titer in Vero E6 cells (**Fig 1F**). Notably, in Calu-3 2b4 cells, the  
139 KR mt had increased viral titer at both 24 and 48 hpi compared to WT SARS-CoV-2 (**Fig 1G**).  
140 These data suggest the KR mt in nucleocapsid alone is sufficient to enhance viral replication.

141 Next, we wanted to examine the ability of other variant mutations in the 203-205 motif of  
142 nucleocapsid to enhance SARS-CoV-2 replication. Using our reverse genetic system, we

143 recreated the R203M mutation in a WA-1 mNG background and evaluated its replication in Vero  
144 E6 and Calu-3 2b4 cells (**S3 Fig**). Interestingly, like the KR mt, in Vero E6 cells the R203M  
145 mutant grew to lower titer at 24 hpi but had a similar endpoint titer compared to WT SARS-CoV-  
146 2 (**S3B Fig**). In Calu-3 2b4 cells, the R203M mutant again mimicked the KR mt, growing to a  
147 higher titer than WT at 24 and 48 hpi (**S3C Fig**). These data suggest that like the KR mt, the  
148 R203M mutation alone is sufficient to enhance SARS-CoV-2 replication.

### 149 **The KR mt enhances SARS-CoV-2 fitness during direct competition.**

150 We next determined if the KR mt increases SARS-CoV-2 fitness using competition assays,  
151 which offer increased sensitivity compared to individual culture experiments (13). WT SARS-  
152 CoV-2 and the KR mt were directly competed by infecting Vero E6 and Calu-3 2b4 cells at a 1:1  
153 plaque forming unit ratio. Twenty-four hpi, total cellular RNA was harvested and the ratio of WT  
154 to KR mt genomes determined by next generation sequencing (NGS)(14). Consistent with the  
155 kinetic data, WT outcompeted the KR mt at a ratio of ~4:1 in Vero E6 cells (**Fig 1H**). In contrast,  
156 the KR mt outcompeted WT at a ratio of ~10:1 in Calu-3 2b4 cells (**Fig 1H**). These data indicate  
157 that the KR mt has a fitness advantage over WT SARS-CoV-2 in Calu-3 2b4, but not Vero E6  
158 cells.

### 159 **The KR mt increases pathogenesis and fitness in vivo**

160 We next determined the effects of the KR mt *in vivo* using a golden Syrian hamster model of  
161 SARS-CoV-2 infection (15). Three- to four-week-old male hamsters underwent intranasal  
162 inoculation with either PBS (mock) or 10<sup>4</sup> plaque forming units (PFU) of WT SARS-CoV-2 or the  
163 KR mt and weight loss was monitored for 10 days post infection (dpi, **Fig 2A**). On days 2 and 4,  
164 a cohort of five animals from each group underwent nasal washing, were euthanized, and  
165 trachea and lung tissue harvested for measurement of viral loads and histopathologic analysis.  
166 On day 10, surviving animals were euthanized and lung tissue harvested for histopathological



167 analysis. Strikingly, animals infected with the KR mt had increased weight loss compared to WT  
168 throughout the experiment (**Fig 2B**). Curiously, weight loss changes did not correlate with  
169 increased viral loads, as no significant viral titer difference in the lung or trachea was observed  
170 between WT and the KR mt (**Fig 2C and D**). Furthermore, the KR mt caused a small, but  
171 significant, decrease in titer in nasal washes on day 2, but not day 4 (**Fig 2E**). Contrasting the  
172 titer data, histopathologic analysis of lungs revealed that the KR mt had more severe lesions  
173 compared to WT SARS-CoV-2 (**S4 Fig**). Compared to mock (**S4A Fig**), both WT and the KR mt  
174 had bronchiolitis and interstitial pneumonia; however, larger and more diffuse pulmonary lesions  
175 were observed in the KR mt on day 4 (**S4B and C Fig**). In addition, the KR mt had cytopathic  
176 alveolar pneumocytes and alveoli containing both mononuclear cells and red blood cells (**S4C**  
177 **Fig**). By day 10, both WT and the KR mt showed signs of recovery, but maintained interstitial  
178 pneumonia adjacent to the bronchi absent in mock-infected animals (**S4D–F Fig**). Notably, the  
179 KR mt had evidence of cytopathic effect in bronchioles, perivascular edema, and immune  
180 infiltration of the endothelium. Together, these data demonstrate that the KR mt increases  
181 disease following SARS-CoV-2 infection *in vivo*.

182 We next evaluated the KR mt's effects on SARS-CoV-2 fitness and transmission *in vivo*.  
183 Singly housed three- to four-week-old male donor hamsters were intranasally inoculated with  
184  $10^4$  PFU of WT SARS-CoV-2 and the KR mt at a ratio of 1:1 (**Fig 2F**). On day 1 of infection,  
185 each donor hamster was co-housed with a recipient for 8 hours to allow transmission. Hamsters  
186 were then separated and SARS-CoV-2 present in the nasal cavities of the donors sampled by  
187 nasal wash. On day 2, each recipient hamster underwent nasal washing to sample transmitted  
188 SARS-CoV-2. Donor and recipient hamsters then underwent nasal washing and harvesting of  
189 lung tissue on days 4 and 5, respectively, and the ratio of WT to KR mt in all samples was  
190 determined by NGS(14). Neither WT nor the KR mt consistently dominated in the donor washes  
191 on day 1; similarly, the day 2 nasal washes from the recipients showed no distinct advantage

192 between KR mt and WT for transmission (**Fig 2G and H**). However, at day 4 and 5 in the donor  
193 and recipient, respectively, the KR mt was slightly more predominant in the nasal wash (**Fig 2G**  
194 **and H**). Notably, the KR mt dominated the SARS-CoV-2 population found in lungs of both donor  
195 and recipient animals on days 4 and 5. Together, these results suggest that the KR mt  
196 outcompetes WT *in vivo* independent of transmission.

### 197 **The KR mt increases viral RNA and antigen levels.**

198 The CoV N protein has previously been shown to play a role in the transcription of viral RNA  
199 (16-19). To evaluate changes in viral RNA levels during infection with the KR mt, we performed  
200 RT-qPCR to measure levels of SARS-CoV-2 transcripts following infection of Calu-3 2b4 cells  
201 (**S5 Fig**). Compared to WT infected cells, the KR mt had a >32-fold increase in levels of all viral  
202 transcripts, demonstrating a broad increase in SARS-CoV-2 RNA levels (**Fig 3A**). This finding is  
203 not surprising considering the increased viral titer observed in Calu-3 2b4 cells (**Fig 1G**). We  
204 subsequently examined the levels of full-length viral RNA in the lungs of infected hamsters (**Fig**  
205 **3B**), finding a significant increase at 2- and 4- dpi. In contrast, the virus lung titer at both time  
206 points had no significant difference (**Fig 2C**), indicating that the KR mt increases the levels of  
207 viral RNA despite not increasing titer. Further extending our analysis, we explored *in vivo*  
208 SARS-CoV-2 N antigen staining in the lungs of infected animals (**Fig 3C**). KR mt infected  
209 animals showed increased viral antigen staining and substantially larger lesion size compared to  
210 WT. Together, these data indicate despite having no effect on lung titer, the KR mt leads to  
211 increased viral RNA accumulation and greater virus spread compared to WT SARS-CoV-2.

### 212 **The KR mt increases phosphorylation of SARS-CoV-2 N**

213 Having confirmed a role in viral RNA transcription, we next considered how mutations in  
214 residues 203-205 of nucleocapsid's SR domain might provide an advantage for SARS-CoV-2.  
215 Nsp3, the multi-faceted viral protease, interacts with the SR domain to increase viral

216 transcription (18-22). Importantly, this interaction is governed by phosphorylation of the SR  
217 domain, which is targeted by the SRPK, GSK-3, and Cdk1 kinases (**Fig 1D**) (5, 22-28) Given  
218 the proximity to key priming residues required for GSK-3 mediated phosphorylation (**Fig 4D**)  
219 (28), we hypothesized that the KR mt alters nucleocapsid phosphorylation. To overcome the  
220 lack of phospho-specific antibodies for nucleocapsid, we used phosphate-affinity SDS-PAGE  
221 (PA SDS-PAGE). PA SDS-PAGE utilizes a divalent  $Zn^{2+}$  compound (Phos-Tag™) within  
222 acrylamide gels that selectively binds to phosphorylated serine, threonine, and tyrosine  
223 residues; the bound  $Zn^{2+}$  decreases electrophoretic mobility of a protein proportionally with the  
224 number of phosphorylated amino acids (29). Importantly, if a protein exhibits multiple  
225 phosphorylation states, this will cause a laddering effect, with each phospho-species appearing  
226 as a distinct band (**Fig 4A**).

227 To assess the KR mt's effects on N-phosphorylation, we infected Calu-3 2b4 cells at a  
228 MOI of 0.01 and harvested whole cell lysates 48 hpi. Lysates then underwent PA SDS-PAGE  
229 followed by western blotting with an N-specific antibody. When analyzed by PA SDS-PAGE, WT  
230 SARS-CoV-2 displayed a two-band pattern consisting of a faint upper and prominent lower  
231 band, corresponding to a highly phosphorylated and a less phosphorylated species, respectively  
232 (**Fig 4B**, lane 1). In contrast, the KR mt displayed four dark bands of progressively slower  
233 mobility, indicating a substantially different phosphorylation pattern (**Fig 4B**, lane 2). Importantly,  
234 all four bands migrated more slowly than the prominent WT band, indicating an overall increase  
235 in phosphorylation in the KR mt, which corresponds to increased virus replication (**Fig 1G**). We  
236 next examined N phosphorylation in Vero E6 cells; cells were infected at a MOI of 0.01 and  
237 whole cell lysates taken 24 hpi. In Vero E6 cells, WT SARS-CoV-2 exhibited 2-bands of equal  
238 strength, indicating a relative increase in phosphorylation compared to Calu-3 2b4 cells (**Fig 4C**,  
239 lane 1). In contrast, the KR mt displayed 3 dark bands with faster mobility relative to WT,  
240 indicating a decrease in overall phosphorylation (**Fig 4C**, lane 2). This reduced phosphorylation

241 corresponds with the replication attenuation seen in this cell type (**Fig 1F**). Together, these data  
242 indicate that the relative level of SARS-CoV-2 nucleocapsid phosphorylation plays a role in virus  
243 replication.

244           Given the KR mt's effects, we next determined if SARS-CoV-2 variants had altered N-  
245 phosphorylation. Calu-3 2b4 cells were infected at a MOI of 0.01 with WA-1 or the alpha, beta,  
246 or kappa variants and whole cell lysates harvested at 48 hpi. When analyzed by PA SDS-  
247 PAGE, WA-1 had a two-band pattern similar to WT SARS-CoV-2, while the alpha variant  
248 displayed a four-band pattern with slower mobility similar to that of the KR mt (**Fig 4B**, lanes 3-  
249 4). Interestingly, the mobilities of the alpha variant bands were decreased compared to the KR  
250 mt indicating an even higher level of phosphorylation, potentially due to the alpha variant's  
251 additional nucleocapsid mutations at D3L and S235F(6, 7). While both the beta (T205I) and  
252 kappa (R203M) variants also displayed slower electrophoretic mobility compared to WA-1, the  
253 beta variant displayed a two-band pattern reminiscent of WA-1 while kappa displayed a  
254 ladder pattern similar to the KR mt (**Fig 4B**, lanes 5-6). Together, these data suggest variant  
255 mutations at residues 203-205 result in increased N phosphorylation.

#### 256 **The KR mt does not alter phosphorylation of virion-associated N.**

257 While CoV N proteins are hyperphosphorylated intracellularly, they are believed to lack  
258 phosphorylation within the mature virion (30, 31). Nevertheless, given the ability of the KR mt to  
259 augment phosphorylation, we were curious if it influenced virion-associated SARS-CoV-2 N. To  
260 examine this, Calu-3 2b4 cells were infected with WT SARS-CoV-2 or the KR mt. 48 hpi, viral  
261 supernatants were taken, clarified, and virions pelleted on a 20% sucrose cushion by  
262 ultracentrifugation. Protein recovered from the pellets was then analyzed by PA SDS-PAGE  
263 followed by western blotting with an N-specific antibody. Curiously, for both WT and the KR mt,  
264 a light upper and dark lower band were detected, indicating some level of N phosphorylation is  
265 present in the SARS-CoV-2 virion, albeit at a lower level than intracellular N (**S6 Fig**). However,

266 the KR mt had no effect on the banding pattern, indicating the KR mt does not affect  
267 phosphorylation of mature virions.

### 268 **The KR mt is more resistant to GSK-3 inhibition.**

269 Our results indicate that changes in N phosphorylation correlate with differences in virus  
270 replication; thus, we sought to modulate N phosphorylation using kinase inhibitors. Prior work  
271 has identified two consensus sites for GSK-3 phosphorylation within the SR domain and  
272 inhibition of GSK-3 has been shown to reduce SARS-CoV-2 replication (**Fig 4D**) (28).  
273 Importantly, the KR mt is proximal to the priming residue of the C-terminus GSK-3 consensus  
274 site, suggesting it may impact GSK-3 mediated N phosphorylation. Therefore, we examined the  
275 impact of GSK-3 inhibition on both WT and the KR mt. Using kenpaullone, a GSK-3 inhibitor, we  
276 showed a dose dependent inhibitory effect on both WT and KR mt titer at 48 hpi (**Fig 4E**).  
277 Importantly, GSK-3 inhibition had a greater impact on WT, significantly increasing the mean titer  
278 difference between WT and the KR mt from ~4-fold to ~38-fold (**S7 Fig**). This suggests that the  
279 KR mt is more resistant to GSK-3 inhibition, and that the change at position 203-204 increases  
280 affinity of the KR mt for GSK-3.

### 281 **An alanine double substitution mimics the KR mt.**

282 Given that variant mutations at residues 203-205 are diverse in sequence, we assessed the  
283 importance of the specific R→K and G→R mutations to the KR mt's enhancement of infection.  
284 To do so, we made a R203A+G204A double alanine substitution mutant (AA mt) in the WA-1  
285 mNG background (**S8 Fig**). After recovery of recombinant SARS-CoV-2, we assessed  
286 replication in Vero E6 and Calu-3 2b4 cells. In contrast with the KR mt, the AA mt had no  
287 significant effect on titers in Vero E6 cells (**Fig 5A**). Nevertheless, the AA mt increased viral  
288 titers over WT in Calu-3 2b4 cells throughout infection, mimicking the augmented replication of  
289 the KR mt (**Fig 5B**). We next tested the fitness of the AA mt by direct competition with WT

290 SARS-CoV-2. Vero E6 and Calu-3 2b4 cells were infected with WT and the AA mt at a 1:1 ratio,  
291 whole cell RNA harvested 24 hpi, and the ratio of WT to AA mt determined by NGS. In Vero E6  
292 cells, the AA mt had a small but consistent fitness advantage over WT (**Fig 5C**). In contrast, the  
293 AA mt outcompeted WT with a ~5:1 ratio during infection of Calu-3 2b4 cells (**Fig 5C**). Overall,  
294 the similarities in replication and fitness between the KR and AA mts in Calu-3 2b4 cells suggest  
295 that the KR mt enhances infection primarily by ablating the ancestral 'RG' motif.

296           Given that the AA mt mimicked the KR mt's enhancement of *in vitro* infection, we next  
297 determined if they employed the same mechanism. Using RT-qPCR, we examined viral RNA  
298 expression in the AA mt (**Fig 5D**). Consistent with the KR mt, at 24 hpi the AA mt increased viral  
299 transcript levels compared to WT in Calu-3 2b4 cells, although the magnitude of change in the  
300 AA mt was less than the KR mt (16 fold vs 32 fold). We next examined changes in N  
301 phosphorylation. Calu-3 2b4 cells were infected at a MOI of 0.01 with WT SARS-CoV-2 or the  
302 AA mt and whole cell lysates were harvested 48 hpi. Lysates then underwent PA SDS-PAGE,  
303 followed by Western blotting for nucleocapsid. Interestingly, the AA mt exhibited several dark  
304 bands with ladder mobility absent in WT, suggesting augmented phosphorylation similar to  
305 the KR mt. However, contrasting with the KR mt, in the AA mt the electrophoretic mobility of the  
306 lowest band was similar to WT (**Fig 5D**). These data suggest that while the KR and AA mts both  
307 alter nucleocapsid phosphorylation, their effects are not identical. Nevertheless, the changes in  
308 phosphorylation induced by the KR and AA mt are both sufficient to enhance SARS-CoV-2  
309 replication. Finally, we examined GSK-3 inhibition comparing WT and AA mt (**Fig 5F**). Similar  
310 to the KR mt, the AA mt was less sensitive to GSK-3 inhibition than WT, suggesting that  
311 disrupting the original RG motif resulted in increased affinity for the kinase. Overall, these data  
312 demonstrate that mutations at positions 203-204 disrupt an ancestral motif that interferes with  
313 GSK-3 kinase activity.

314

## 315 **Discussion**

316 In this manuscript, we investigate a highly variable motif in SARS-CoV-2 nucleocapsid by  
317 characterizing the effects of the R203K+G204R double substitution mutation (KR mt), present in  
318 the alpha and omicron variants. Inserting the KR mt in the WA-1 background demonstrated that  
319 the KR mt alone is sufficient to increase titer and fitness in respiratory cells. Similarly, the KR mt  
320 is sufficient to increase disease in infected hamsters and enhance fitness in the lung during  
321 direct competition studies. Importantly, we demonstrate that the KR mt augmented nucleocapsid  
322 phosphorylation, which correlated with increased virus replication. We also demonstrate the KR  
323 mt is resistant to inhibition of the GSK-3 kinase, mechanistically linking N phosphorylation with  
324 phenotypic changes. SARS-CoV-2 variants harboring analogous mutations in the 203-205 motif  
325 also exhibit augmented nucleocapsid phosphorylation, suggesting that increasing N  
326 phosphorylation is a common mechanism driving variant emergence. Notably, an analogous  
327 double alanine substitution (AA mt) also showed increased replication, fitness, altered  
328 nucleocapsid phosphorylation, and similar resistance to kinase inhibition. Together, these data  
329 suggest that the KR mt and similar mutations enhance SARS-CoV-2 infection by increasing N  
330 phosphorylation through disruption of the ancestral “RG” motif.

331 The KR mt occurs within the serine-rich (SR) domain of nucleocapsid, which has a  
332 complex role during SARS-CoV-2 infection. This region of N is hyper-phosphorylated  
333 intracellularly, but hypo-phosphorylated within the mature virion (30, 31). Several studies  
334 suggest that phosphorylation of the SR domain acts as a biophysical switch, regulating  
335 nucleocapsid function through phase separation (27, 32, 33). In the proposed model,  
336 unphosphorylated nucleocapsid forms gel-like condensates with viral RNA and the SARS-CoV-  
337 2 membrane (M) protein to facilitate genome packaging and virus assembly. In contrast,  
338 phosphorylated nucleocapsid forms distinct liquid-like condensates to promote N binding to  
339 SARS-CoV-2 nsp3 (27), G3P1 in stress granules (32), and (presumably) other nucleocapsid  
340 functions (34). While not tested in the context of infection, this model is consistent with studies

341 demonstrating interactions between N and M(35, 36), G3BP1 and G3BP2 within stress  
342 granules(37-39), and phosphorylated N and nsp3 to promote the synthesis of viral RNA(18-22,  
343 30, 40). Within this context, the KR mt may optimize this biomolecular switch for human  
344 infection, increasing the amount of phosphorylated nucleocapsid and shifting the overall function  
345 of N during infection. Alternatively, the KR mt may impact the interaction between nucleocapsid  
346 and host 14-3-3 proteins which bind the SR domain in a phosphorylation dependent  
347 manner(41). This interaction is required for cytoplasmic localization of nucleocapsid in SARS-  
348 CoV (42). Notably, one 14-3-3 binding site encompasses the 203-205 motif examined in this  
349 study,(41) suggesting that the KR mt may enhance infection by altering this interaction.

350 Overall, in this study we establish that the KR mt enhances SARS-CoV-2 infection  
351 relative to WT, increasing viral fitness *in vitro* and *in vivo*, which along with the N501Y  
352 mutation(43), likely selected for the emergence of the alpha variant. We also find that the KR mt  
353 increases nucleocapsid phosphorylation; coupled with increased resistance to GSK-3 inhibition,  
354 these results provide a molecular basis for the KR mt's effects. Importantly, we show that other  
355 variant mutations in this motif also increase nucleocapsid phosphorylation, which may have  
356 aided in the emergence of their respective lineages. When taken with the prevalence of  
357 mutations in residues 203-205 of the SR domain among circulating variants, these data suggest  
358 that mutations increasing nucleocapsid phosphorylation represent a positive selection event for  
359 SARS-CoV-2 during adaptation to human infection. Importantly, our work highlights that  
360 mutations outside of SARS-CoV-2 spike have significant effects on infection, and must not be  
361 overlooked while characterizing mechanisms of variant emergence.

362



## 363 **Materials and Methods**

### 364 **Construction of Recombinant SARS-CoV-2**

365 The sequence of recombinant wild-type (WT) SARS-CoV-2 is based on the USA-WA1/2020  
366 strain provided by the World Reference Center for Emerging Viruses and Arboviruses  
367 (WRCEVA) and originally isolated by the USA Centers for Disease Control and Prevention(10).  
368 Recombinant WT SARS-CoV-2 and mutant viruses were created using a cDNA clone and  
369 standard cloning techniques as described previously (8, 9). The recombinant SARS-CoV-2  
370 alpha variant (B.1.1.7) was created by introducing twenty-three individual mutations to the WT  
371 SARS-CoV-2 infectious clone(12). Construction of WT SARS-CoV-2 and mutant viruses were  
372 approved by the University of Texas Medical Branch Biosafety Committee.

### 373 **Cell Culture**

374 Vero E6 cells were grown in DMEM (Gibco #11965-092) supplemented with 10% fetal bovine  
375 serum (FBS) and 1% antibiotic/antimitotic (Gibco #5240062). Calu-3 2b4 cells were grown in  
376 DMEM supplemented with 10% FBS, 1% antibiotic/antimitotic, and 1 mg/ml sodium pyruvate.

### 377 **In vitro SARS-CoV-2 infection**

378 Vero E6 and Calu3 2b4 cells were infected with SARS-CoV-2 according to standard protocols  
379 described previously (9, 44). Briefly, growth medium was removed, and cells were subsequently  
380 infected with SARS-CoV-2 at a multiplicity of infection (MOI) of 0.01 diluted in 100 µl of PBS.  
381 Cells were then incubated for 45 minutes at 37°C and 5% CO<sub>2</sub>. After incubation, the inoculum  
382 was removed, cells washed three times with PBS, and fresh growth medium returned. For  
383 inhibitor experiments, Calu-3 cells were pretreated with 1-100 µM kenpaullone (Sigma-Aldrich  
384 #422000) in growth media for 1 hour at 37°C. Cells were then infected with SARS-CoV-2 at an  
385 MOI of 0.01 for 45 min at 37°C and 5% CO<sub>2</sub>. Inoculum was then removed, cells were then  
386 washed three times with PBS, and fresh growth media with kenpaullone added.

### 387 **Focus forming assays**

388 For viral titrations, a focus-forming assay (FFA) was developed by adapting a protocol for a  
389 SARS-CoV-2 focus reduction neutralization test (FRNT) published elsewhere (45). Briefly,  
390 culture supernatants, nasal washes, or homogenized tissue containing SARS-CoV-2 underwent  
391 five 10-fold serial dilutions. 20  $\mu$ l of the raw sample or each dilution was then used to infect  
392 individual wells of 96-well plates containing Vero E6 cells and incubated for 45 minutes at 37°C  
393 and 5% CO<sub>2</sub>. After incubation, the inoculum was removed and 100  $\mu$ l of 0.85% methylcellulose  
394 (Sigma# M0512) overlay added to each well and cells incubated for 24 hours at 37°C and 5%  
395 CO<sub>2</sub>. After incubation, the overlay was removed, cells washed three times with PBS, and cells  
396 fixed with 10% formalin for 30 minutes to inactivate SARS-CoV-2. Cells were then  
397 permeabilized by incubating in 0.1% saponin/0.1% bovine serum albumin in PBS for 30 minutes  
398 followed by treatment with a nucleocapsid specific antibody (provided by S. Makino). After  
399 overnight incubation at 4°C, cells were washed three times with PBS and incubated with a  
400 horseradish peroxidase (HRP)-conjugated anti-rabbit secondary antibody (Cell Signaling #7074)  
401 for 1 hour at room temperature. The secondary antibody was then removed by washing three  
402 times with PBS and foci developed by the application of TruBlue HRP Substrate (Seracare Life  
403 Sciences #55100030). Images were then taken with a Cytation 7 cell imaging multi-mode reader  
404 (BioTek) and foci counted manually. Prior to inactivation with 10% formalin, all procedures  
405 involving the use of infectious SARS-CoV-2 were performed in Biosafety Level 3 (BSL3) or  
406 Animal Biosafety Level 3 (ABSL3) facilities at the University of Texas Medical Branch  
407 (Galveston, TX).

#### 408 **In vitro competition assays**

409 Vero E6 or Calu-3 2b4 cells were infected at a 1:1 ratio of WT to mutant SARS-CoV-2, as  
410 determined by stock titers. Twenty-four hours post infection, whole cell RNA was harvested by  
411 the addition of Triazol reagent (Invitrogen #15596026) and RNA extracted with the RNA  
412 Miniprep Plus kit (Zymo Research #R2072) per the manufacturer's instructions.

## 413 **Library preparation, sequencing, and analysis**

414 Extracted RNA samples were prepared for Tiled-ClickSeq libraries(14), with a pool of 396  
415 unique primers. A modified pre-RT annealing protocol was applied in this study. Briefly, a  
416 mixture of template RNA, AzDNT/dNTP, and primer pools were heated at 95°C for 2 min;  
417 ramped down to 65°C at 1°C/s; incubated at 65°C for 30s; ramped down to 50°C at 0.1°C/s; the  
418 rest of RT components were added to libraries while samples were held at 50°C. All subsequent  
419 steps followed the previously described method(14), and the final libraries comprising 300-700  
420 bps fragments were pooled and sequenced on a Illumina NextSeq platform with paired-end  
421 sequencing.

422 The raw Illumina data of the Tiled-ClickSeq libraries were processed with previously established  
423 bioinformatics pipelines (14). One modification is the introduction of ten wild cards (“N”) covering  
424 the KR and AA mutations in the reference genome to allow *bowtie2*(46) to align reads to wild  
425 type or variant genomes without bias. PCR duplications were removed using *UMI-tools*(47), and  
426 the number of unique reads representing wild type, KR and AA variants were counted  
427 thereafter. All raw sequencing data are available in the NCBI Small Read Archive with  
428 BioProject ID: PRJNA773399.

## 429 **Analysis of publicly available genomic data**

430 SARS-CoV-2 sequences were accessed from the GISAID database on February 14, 2022(6).  
431 Sequences were binned by the month during which the sample was collected. The number of  
432 R203M, R203K+G204R, T205I, and all other non-wild type options at positions 203-205 were  
433 recorded and subtracted from the total number of sequences, with the balance assumed wild  
434 type at positions 203-205. Data was then graphed as a percent of total sequences collected in  
435 that month.

## 436 **Hamster infection studies**

437 For all experiments, golden Syrian hamsters (male, three- to four-week old) were purchased  
438 from Envigo. All studies were carried out in accordance with a protocol approved by the UTMB  
439 Institutional Animal Care and Use Committee and complied with USDA guidelines in a  
440 laboratory accredited by the Association for Assessment and Accreditation of Laboratory Animal  
441 Care. Procedures involving infectious SARS-CoV-2 were performed in the Galveston National  
442 Laboratory ABSL3 facility.

443 For pathogenesis studies, animals were housed in groups of five and intranasally inoculated  
444 with  $10^4$  PFU of WT or KR mt SARS-CoV-2. For competition/transmission studies, animals were  
445 intranasally inoculated with  $10^4$  PFU of SARS-CoV-2 comprising both WT and the KR mt at a  
446 1:1 ratio based on stock titer. During competition/transmission studies, animals were singly  
447 housed throughout the experiment, except during the 8-hour transmission period, when they  
448 were housed in groups of two (1 donor and 1 recipient). For all experiments, animals were  
449 monitored daily for weight loss and development of clinical disease until the termination of the  
450 experiment. Inoculations and other animal manipulations (except weighing) were carried out  
451 under anesthesia with isoflurane (Henry Schein Animal Health).

#### 452 **SDS-PAGE and western blotting**

453 Vero E6 or Calu-3 2b4 cells were infected with SARS-CoV-2 at an MOI of 0.01 and incubated  
454 for 24 or 48 hours, respectively. Virus was then inactivated and whole cell lysates taken by the  
455 addition of 2× Laemmli buffer (Bio-Rad #161073) + 2-mercaptoethanol (Bio-Rad #1610710)  
456 directly to the cell monolayer followed by incubation at 95°C for 15 minutes. For standard SDS-  
457 PAGE, 4–20% Mini-PROTEAN TGX Gels (Bio-Rad #4561093) were used for electrophoresis.  
458 For phosphate-affinity SDS-PAGE, 7.5% SuperSep™ Phos-Tag™ gels (Wako Chemical #198-  
459 17981) were used for electrophoresis. For all gels, protein was transferred to polyvinylidene  
460 difluoride (PVDF) membranes and blotted with a SARS-CoV nucleocapsid specific antibody  
461 (Novus Biologicals #NB100-56576) followed by horseradish peroxidase (HRP)-conjugated anti-  
462 rabbit secondary antibody (Cell Signaling Technology #7074). Images were developed by

463 treating blots for 5 minutes with Clarity Western ECL substrate (Bio-Rad #1705060) followed by  
464 imaging on a ChemiDoc MP System (Bio-Rad #12003154). Images were processed with  
465 ImageLab 6.0.1 (Bio-Rad #2012931).

#### 466 **Virion Purification**

467 Calu-3 2b4 cells were infected with WT or the KR mt at an MOI of 0.01. Forty-eight hours post  
468 infection; the supernatants were collected and clarified by centrifugation at 1200 rpm. SARS-  
469 CoV-2 virions were then pelleted by ultracentrifugation through a 20% sucrose cushion at  
470 26,000 rpm for 3 hours using a Beckman SW32 Ti rotor. Virion pellets were then inactivated in  
471 2X Laemmli buffer (Bio-Rad #161073). N phosphorylation was then analyzed as described in  
472 'SDS-PAGE and western blotting.'

#### 473 **Histology**

474 Left lungs (Days 2 and 4) or both lungs (Day 10) were harvested from hamsters and fixed in  
475 10% buffered formalin solution for at least 7 days. After buffer exchange, fixed tissue was then  
476 embedded in paraffin, cut into 5  $\mu$ M sections, and stained with hematoxylin and eosin (H&E) on  
477 a SAKURA VIP6 processor by the University of Texas Medical Branch Histology Laboratory.  
478 Briefly, fixed tissues were submerged twice in 10% formalin baths, followed by repeated  
479 submersion in a series of alcohol baths ranging from 65-100% alcohol. Tissues were then  
480 submerged in xylene three times before embedding in paraffin at 60°C. Sections were then cut  
481 and mounted on slides, deparaffinized by repeated washing with xylene and alcohol, and then  
482 stained with hematoxylin and counterstained with eosin. Alternatively, after mounting slides  
483 were deparaffinized and antigen stained in house with a SARS-CoV-2 N specific antibody (Sino  
484 Biologicals #40143-R001) at a dilution of 1:30,000 followed by goat anti-rabbit secondary  
485 (Vector Labs #BA1000). Signal was developed with ImmPact NovaRED HRP substrate (Vector  
486 Labs # SK-4805).

#### 487 **Real-time Quantitative PCR**

488 For determination of transcript levels in *in vitro* samples, cells were infected as described in 'In  
489 vitro SARS-CoV-2 infection.' 24 hours post infection, supernatants were discarded and whole  
490 cell RNA collected by the addition of Triazol reagent (Invitrogen #15596026). For *in vivo*  
491 samples, hamsters were infected as described in 'hamster infection studies' and lung lobes  
492 placed in RNAlater (Sigma-Aldrich #R0901) and stored at -80°C. Lung lobes were then placed  
493 in 1 milliliter Triazol and homogenized with zirconia beads with a MagNA Lyser instrument  
494 (Roche Life Science).

495 RNA from all sources was extracted from Triazol using the Direct-zol RNA Miniprep Plus kit  
496 (Zymo Research #R2072) by the manufacturer's instructions. cDNA was then generated from  
497 each RNA sample with the iScript cDNA Synthesis kit (Bio-Rad #1708891). RT-qPCR was  
498 performed with Luna Universal qPCR Master Mix (New England Biolabs #M3003) per the  
499 manufacturer's instructions on a CFX Connect instrument (Bio-Rad #1855200). All experiments  
500 used an annealing temperature of 51°C. For the analysis of *in vitro* samples, the relative full-  
501 length and subgenomic transcript levels between mutants and WT were determined by the  
502 delta-delta CT method, with 18S ribosomal RNA serving as an internal control. For *in vivo*  
503 samples, the levels of full-length SARS-CoV-2 genomes were quantitated with an 8-point  
504 standard curve ( $1 \times 10^1$  to  $1 \times 10^8$  copies per  $\mu$ l).

505 A common forward primer binding upstream of the transcription regulatory sequence (TRS)  
506 leader region was used for all transcripts (ACCAACCAACTTTCGATCTCT). For determination  
507 of full-length SARS-CoV-2 genomes, a reverse primer targeting downstream of the TRS leader  
508 region was used (CTCGTGTCCTGTCAACGACA). For each sub-genomic (sg) transcript,  
509 reverse primers downstream of each TRS body sequence were used: sg2  
510 (TGCAGGGGGTAATTGAGTTCT), sg3 (GCGCGAACAAAATCTGAAGGA), sg4  
511 (AGCAAGAATACCACGAAAGCA), sg5 (ACCGTTGGAATCTGCCATGG), sg6  
512 (GCCAATCCTGTAGCGACTGT), sg7 [mNeonGreen] (TGCCCTCGTATGTTCCAGAAG), sg8  
513 (ACATTCTTGGTGAAATGCAGCT), and sg9 (CCCCTGCGTTCTCCATTCT). The 18S

514 targeting primers used were forward (CCGGTACAGTGAAACTGCGAATG) and reverse  
515 (GTTATCCAAGTAGGAGAGGAGCGAG).

516

517  
518  
519  
520  
521  
522  
523  
524  
525  
526  
527  
528  
529  
530  
531  
532  
533  
534  
535  
536  
537  
538  
539  
540  
541  
542  
543  
544  
545  
546  
547  
548  
549  
550  
551  
552  
553  
554  
555  
556  
557  
558  
559  
560  
561  
562

## References

1. International Monetary Fund Research Dept. World Economic Outlook, April 2020 : The Great Lockdown. Paper. International Monetary Fund, Dept. R; 2020 April 14, 2020.
2. World Health Organization. Coronavirus disease (COVID-19) pandemic. 2021;2021(29 September).
3. World Health Organization. Tracking SARS-CoV-2 variants. 2022;2022(17 February).
4. Plante JA, Mitchell BM, Plante KS, Debbink K, Weaver SC, Menachery VD. The variant gambit: COVID-19's next move. *Cell Host Microbe*. 2021.
5. Ye Q, West AMV, Silletti S, Corbett KD. Architecture and self-assembly of the SARS-CoV-2 nucleocapsid protein. *Protein Sci*. 2020;29(9):1890-901.
6. Elbe S, Buckland-Merrett G. Data, disease and diplomacy: GISAID's innovative contribution to global health. *Glob Chall*. 2017;1(1):33-46.
7. Mullen JL, Tsuen G, Latif AA, Alkuzweny M, Cano M, Haag E, et al. outbreak.info 2020 [cited 2021 1 October 2021]. Available from: <https://outbreak.info/>
8. Xie X, Lokugamage KG, Zhang X, Vu MN, Muruato AE, Menachery VD, et al. Engineering SARS-CoV-2 using a reverse genetic system. *Nature Protocols*. 2021;16(3):1761-84.
9. Xie X, Muruato A, Lokugamage KG, Narayanan K, Zhang X, Zou J, et al. An Infectious cDNA Clone of SARS-CoV-2. *Cell Host & Microbe*. 2020;27(5):841-8.e3.
10. Harcourt J, Tamin A, Lu X, Kamili S, Sakthivel SK, Murray J, et al. Severe Acute Respiratory Syndrome Coronavirus 2 from Patient with Coronavirus Disease, United States. *Emerg Infect Dis*. 2020;26(6):1266-73.
11. Menachery VD, Eisfeld AJ, Schäfer A, Josset L, Sims AC, Proll S, et al. Pathogenic influenza viruses and coronaviruses utilize similar and contrasting approaches to control interferon-stimulated gene responses. *mBio*. 2014;5(3):e01174-14.
12. Liu Y, Liu J, Johnson BA, Xia H, Ku Z, Schindewolf C, et al. Delta spike P681R mutation enhances SARS-CoV-2 fitness over Alpha variant. *bioRxiv*. 2021:2021.08.12.456173.
13. Plante JA, Liu Y, Liu J, Xia H, Johnson BA, Lokugamage KG, et al. Spike mutation D614G alters SARS-CoV-2 fitness. *Nature*. 2021;592(7852):116-21.
14. Jaworski E, Langsjoen RM, Michell B, Judy B, Newman P, Plante JA, et al. Tiled-ClickSeq for targeted sequencing of complete coronavirus genomes with simultaneous capture of RNA recombination and minority variants. *Elife*. 2021.
15. Imai M, Iwatsuki-Horimoto K, Hatta M, Loeber S, Halfmann PJ, Nakajima N, et al. Syrian hamsters as a small animal model for SARS-CoV-2 infection and countermeasure development. *Proceedings of the National Academy of Sciences*. 2020;117(28):16587.
16. Baric RS, Nelson GW, Fleming JO, Deans RJ, Keck JG, Casteel N, et al. Interactions between coronavirus nucleocapsid protein and viral RNAs: implications for viral transcription. *J Virol*. 1988;62(11):4280-7.
17. Stohlman SA, Baric RS, Nelson GN, Soe LH, Welter LM, Deans RJ. Specific interaction between coronavirus leader RNA and nucleocapsid protein. *J Virol*. 1988;62(11):4288-95.
18. Verheije MH, Hagemeyer MC, Ulasli M, Reggiori F, Rottier PJ, Masters PS, et al. The coronavirus nucleocapsid protein is dynamically associated with the replication-transcription complexes. *J Virol*. 2010;84(21):11575-9.
19. Zuniga S, Cruz JL, Sola I, Mateos-Gomez PA, Palacio L, Enjuanes L. Coronavirus nucleocapsid protein facilitates template switching and is required for efficient transcription. *J Virol*. 2010;84(4):2169-75.



- 563 20. Hurst KR, Koetzner CA, Masters PS. Characterization of a critical interaction between  
564 the coronavirus nucleocapsid protein and nonstructural protein 3 of the viral replicase-  
565 transcriptase complex. *J Virol*. 2013;87(16):9159-72.
- 566 21. Hurst KR, Ye R, Goebel SJ, Jayaraman P, Masters PS. An interaction between the  
567 nucleocapsid protein and a component of the replicase-transcriptase complex is crucial for the  
568 infectivity of coronavirus genomic RNA. *J Virol*. 2010;84(19):10276-88.
- 569 22. Koetzner CA, Hurst-Hess KR, Kuo L, Masters PS. Analysis of a crucial interaction  
570 between the coronavirus nucleocapsid protein and the major membrane-bound subunit of the  
571 viral replicase-transcriptase complex. *Virology*. 2022;567:1-14.
- 572 23. Bouhaddou M, Memon D, Meyer B, White KM, Rezelj VV, Correa Marrero M, et al.  
573 The Global Phosphorylation Landscape of SARS-CoV-2 Infection. *Cell*. 2020;182(3):685-712  
574 e19.
- 575 24. Davidson AD, Williamson MK, Lewis S, Shoemark D, Carroll MW, Heesom KJ, et al.  
576 Characterisation of the transcriptome and proteome of SARS-CoV-2 reveals a cell passage  
577 induced in-frame deletion of the furin-like cleavage site from the spike glycoprotein. *Genome  
578 Medicine*. 2020;12(1):68.
- 579 25. Klann K, Bojkova D, Tascher G, Ciesek S, Münch C, Cinatl J. Growth Factor Receptor  
580 Signaling Inhibition Prevents SARS-CoV-2 Replication. *Mol Cell*. 2020;80(1):164-74.e4.
- 581 26. Yaron TM, Heaton BE, Levy TM, Johnson JL, Jordan TX, Cohen BM, et al. The FDA-  
582 approved drug Alectinib compromises SARS-CoV-2 nucleocapsid phosphorylation and inhibits  
583 viral infection in vitro. *bioRxiv*. 2020:2020.08.14.251207.
- 584 27. Carlson CR, Asfaha JB, Ghent CM, Howard CJ, Hartooni N, Safari M, et al.  
585 Phosphoregulation of Phase Separation by the SARS-CoV-2 N Protein Suggests a Biophysical  
586 Basis for its Dual Functions. *Mol Cell*. 2020;80(6):1092-103.e4.
- 587 28. Liu X, Verma A, Garcia G, Jr., Ramage H, Lucas A, Myers RL, et al. Targeting the  
588 coronavirus nucleocapsid protein through GSK-3 inhibition. *Proc Natl Acad Sci U S A*.  
589 2021;118(42).
- 590 29. Kinoshita E, Kinoshita-Kikuta E, Koike T. The Cutting Edge of Affinity Electrophoresis  
591 Technology. *Proteomes*. 2015;3(1):42-55.
- 592 30. Wu CH, Chen PJ, Yeh SH. Nucleocapsid phosphorylation and RNA helicase DDX1  
593 recruitment enables coronavirus transition from discontinuous to continuous transcription. *Cell  
594 Host Microbe*. 2014;16(4):462-72.
- 595 31. Wu CH, Yeh SH, Tsay YG, Shieh YH, Kao CL, Chen YS, et al. Glycogen synthase  
596 kinase-3 regulates the phosphorylation of severe acute respiratory syndrome coronavirus  
597 nucleocapsid protein and viral replication. *J Biol Chem*. 2009;284(8):5229-39.
- 598 32. Lu S, Ye Q, Singh D, Cao Y, Diedrich JK, Yates JR, 3rd, et al. The SARS-CoV-2  
599 nucleocapsid phosphoprotein forms mutually exclusive condensates with RNA and the  
600 membrane-associated M protein. *Nat Commun*. 2021;12(1):502.
- 601 33. Cubuk J, Alston JJ, Incicco JJ, Singh S, Stuchell-Breteron MD, Ward MD, et al. The  
602 SARS-CoV-2 nucleocapsid protein is dynamic, disordered, and phase separates with RNA. *Nat  
603 Commun*. 2021;12(1):1936.
- 604 34. McBride R, van Zyl M, Fielding BC. The coronavirus nucleocapsid is a multifunctional  
605 protein. *Viruses*. 2014;6(8):2991-3018.
- 606 35. He R, Leeson A, Ballantine M, Andonov A, Baker L, Dobie F, et al. Characterization of  
607 protein-protein interactions between the nucleocapsid protein and membrane protein of the  
608 SARS coronavirus. *Virus Res*. 2004;105(2):121-5.

- 609 36. Hurst KR, Kuo L, Koetzner CA, Ye R, Hsue B, Masters PS. A major determinant for  
610 membrane protein interaction localizes to the carboxy-terminal domain of the mouse coronavirus  
611 nucleocapsid protein. *J Virol*. 2005;79(21):13285-97.
- 612 37. Gordon DE, Jang GM, Bouhaddou M, Xu J, Obernier K, White KM, et al. A SARS-CoV-  
613 2 protein interaction map reveals targets for drug repurposing. *Nature*. 2020;583(7816):459-68.
- 614 38. Li J, Guo M, Tian X, Wang X, Yang X, Wu P, et al. Virus-Host Interactome and  
615 Proteomic Survey Reveal Potential Virulence Factors Influencing SARS-CoV-2 Pathogenesis.  
616 *Med (N Y)*. 2020.
- 617 39. Zheng ZQ, Wang SY, Xu ZS, Fu YZ, Wang YY. SARS-CoV-2 nucleocapsid protein  
618 impairs stress granule formation to promote viral replication. *Cell Discov*. 2021;7(1):38.
- 619 40. Cong Y, Ulasli M, Schepers H, Mauthe M, V'Kovski P, Kriegenburg F, et al.  
620 Nucleocapsid Protein Recruitment to Replication-Transcription Complexes Plays a Crucial Role  
621 in Coronaviral Life Cycle. *J Virol*. 2020;94(4).
- 622 41. Tugaeva KV, Hawkins DEDP, Smith JLR, Bayfield OW, Ker D-S, Sysoev AA, et al. The  
623 Mechanism of SARS-CoV-2 Nucleocapsid Protein Recognition by the Human 14-3-3 Proteins.  
624 *Journal of Molecular Biology*. 2021;433(8):166875.
- 625 42. Surjit M, Kumar R, Mishra RN, Reddy MK, Chow VT, Lal SK. The severe acute  
626 respiratory syndrome coronavirus nucleocapsid protein is phosphorylated and localizes in the  
627 cytoplasm by 14-3-3-mediated translocation. *J Virol*. 2005;79(17):11476-86.
- 628 43. Liu Y, Liu J, Plante KS, Plante JA, Xie X, Zhang X, et al. The N501Y spike substitution  
629 enhances SARS-CoV-2 transmission. *bioRxiv*. 2021.
- 630 44. Josset L, Menachery VD, Gralinski LE, Agnihothram S, Sova P, Carter VS, et al. Cell  
631 host response to infection with novel human coronavirus EMC predicts potential antivirals and  
632 important differences with SARS coronavirus. *mBio*. 2013;4(3):e00165-13.
- 633 45. Vanderheiden A, Edara VV, Floyd K, Kauffman RC, Mantus G, Anderson E, et al.  
634 Development of a Rapid Focus Reduction Neutralization Test Assay for Measuring SARS-CoV-  
635 2 Neutralizing Antibodies. *Curr Protoc Immunol*. 2020;131(1):e116.
- 636 46. Langmead B, Salzberg SL. Fast gapped-read alignment with Bowtie 2. *Nat Methods*.  
637 2012;9(4):357-9.
- 638 47. Smith T, Heger A, Sudbery I. UMI-tools: modeling sequencing errors in Unique  
639 Molecular Identifiers to improve quantification accuracy. *Genome Res*. 2017;27(3):491-9.

640

641

642 **Acknowledgments:** We would like to thank Shinji Makino for gifting a nucleocapsid antibody.

643 **Author contributions:**

644 Conceptualization: BAJ, VDM; Formal analysis: BAJ, YZ, JAP, ALR; Funding acquisition: BAJ,  
645 YZ, SCW, P-YS, ALR, VDM; Investigation: BAJ, YZ, KGL, MNV, NB, BK, CS, PACV, YL, DS,  
646 JAP, XX, DW, KSP; Methodology: BAJ, YZ, PACV, JAP, ALR, SCW, VDM; Project  
647 Administration: BAJ, VDM; Supervision: PA, SCW, P-YS, KSP, ALR, VDM, Visualization: BAJ,  
648 JAP, DW, Writing – original draft: BAJ, VDM; Writing – review and editing: BAJ, P-YS, PACV,  
649 JAP, YL, XX, SCW, DW, ALR, CS, KSP, VDM

650 **Data Reporting:** All raw sequencing data are available in the NCBI Small Read Archive  
651 Bioproject ID: PRJNA773399. Raw data available from the corresponding author upon request.

652 **Correspondence and requests for materials** should be addressed to V.D.M.

653

654

## Figure Captions

655

**Fig 1. The KR mt enhances SARS-CoV-2 replication.** (A) Amino acid frequencies for nucleocapsid residues 203-205 in SARS-CoV-2 sequences reported to the GISAID, binned by month of collection and graphed as percent of total sequences reported during that period. (B-C) Viral titer from Vero E6 (B) or Calu-3 2b4 cells (C) infected with WA-1 (black) or the alpha variant (red) at an MOI of 0.01 ( $n \geq 6$ ). (D). Schematic of the SR domain of SARS-CoV-2 nucleocapsid. Variable residues are displayed as red text within the sequence of their corresponding lineages. Phosphorylated residues are indicated by a †. (E) Schematic of the SARS-CoV-2 genome, showing the creation of the KR mutation and the replacement of ORF7 with the mNG reporter protein. (F-G) Viral titer of Vero E6 (F) or Calu-3 2b4 (G) cells infected with WT (black) or the KR mt (red) at a MOI of 0.01 ( $n=9$ ). (H) Competition assay between WT (gray) and KR mt (red) in Vero E6 or Calu-3 2b4 cells infected at a 1:1 input ratio with an MOI of 0.01 ( $n=6$ ). Titer data are the mean  $\pm$  s.d. For competition, individual replicates are graphed as points, while the mean percentage of each virus is displayed as a bar graph. Statistical significance was determined by two-tailed student's T-test with  $p \leq 0.05$  (\*),  $p \leq 0.01$  (\*\*), and  $p \leq 0.001$  (\*\*\*). Grey dotted lines are equal to LOD.

670

**Fig 2. The KR mt enhances SARS-CoV-2 pathogenesis and fitness.** (A) Schematic of the infection of hamsters with SARS-CoV-2. (B-E) Three- to four-week-old male hamsters were mock-infected (gray) or inoculated with  $10^4$  PFU of WT SARS-CoV-2 (black) or the KR mt (red). Animals were then monitored for weight loss (B). On days 2 and 4 post infection, viral titers in the lung (C), trachea (D), and from nasal washes (E) were determined. (F) Schematic of competition/transmission experiment. (G-H) Three- to four-week-old male donor hamsters were inoculated with  $10^4$  PFU of WT SARS-CoV-2 and the KR mt at a 1:1 ratio. On day 1 of the experiment, donor and recipient hamsters were co-housed for 8 hours, then separated, and the donor hamsters underwent nasal washing. On day 2, recipient hamsters were nasal washed. Hamsters were then monitored and nasal washes and lung tissue harvested on days 4 (donors)

679

680 and 5 (recipients). The ratio of WT (gray) to KR mt (red) was then determined by NGS of all  
681 donor (G) and recipient (H) samples. For weight loss data, mean percent weight loss was  
682 graphed  $\pm$  s.e.m. For titer data, individuals were graphed with means  $\pm$  s.d. indicated by lines.  
683 For competition studies, individual replicates are graphed as points, while bars represent the  
684 mean. Statistical significance was between WT and the KR mt was determined by student's T-  
685 Test with  $p \leq 0.05$  (\*),  $p \leq 0.01$  (\*\*), and  $p \leq 0.001$  (\*\*\*). Grey dotted lines are equal to LOD.

686 **Fig 3. The KR mt increases levels of viral RNA and antigen.** (A) Full-length and subgenomic  
687 transcript levels 24 hours post infection from Calu-3 2b4 cells infected at an MOI of 0.01 with  
688 WT SARS-CoV-2 or the KR mt (n=3). Transcript levels were normalized to 18S ribosomal RNA  
689 and graphed as the fold change in the KR mt relative to WT (B-C) Three- to four-week old male  
690 hamsters were inoculated with PBS (mock) or  $10^4$  PFU of WT or the KR mt. On days 2 and 4  
691 post infection, lung tissue was harvested. The levels of full-length SARS-CoV-2 RNA in WT and  
692 KR mt infected animals (n=5) (B). Representative SARS-CoV-2 antigen staining (anti-  
693 Nucleocapsid) of lung tissue from mock, WT, or KR mt infected animals (n=5) (C). For *in vitro*  
694 transcripts, bars are mean titer  $\pm$  s.d. For *in vivo* RNA, individual replicates are graphed with  
695 means  $\pm$  s.d. indicated by lines. Significance was determined by student's T-Test with  $p \leq 0.05$  (\*)  
696 and  $p \leq 0.01$  (\*\*).

697 **Fig 4. The KR mt increases N phosphorylation to enhance infection.** (A) Schematic of  
698 phosphate-affinity (PA) SDS-PAGE. (B) Whole cell lysates from Calu-3 2b4 cells infected with  
699 SARS-CoV-2 WA-1-mNG (WT), the KR mt, WA-1, alpha, beta, and kappa variants were  
700 analyzed by PA SDS-Page (top) or standard SDS-PAGE (bottom) followed by blotting with an  
701 N-specific antibody (n=3). (C) Whole cell lysates from Vero E6 cells infected with WT or the KR  
702 mt and analyzed by PA-SDS-Page (top) or standard SDS-Page (bottom) followed by blotting  
703 with an N-specific antibody (n=3). (D) Schematic of phosphorylation by GSK-3 of the SR domain  
704 of SARS-CoV-2 N. Residues targeted by GSK-3 are indicated with arrows and priming residues  
705 designated by a '\*'. (E) Viral titer 48 hours post infection from Calu-3 2b4 cells infected with WT

706 SARS-CoV-2 (gray) or the KR mt (red) at an MOI of 0.01. Cells were treated with the indicated  
707 concentrations of kenpaullone prior to and during infection. Bars are the mean titer  $\pm$  s.d. (n=4).  
708 Significance indicates a change in mean titer difference and was determined by student's T-Test  
709 with  $p \leq 0.05$  (\*) and  $p \leq 0.01$  (\*\*).

710 **Fig 5. The AA mt mimics the KR mt's enhancement of SARS-CoV-2 infection. (A-B).** Viral  
711 titer from Vero E6 (A) or Calu-3 2b4 (B) cells infected at an MOI of 0.01 with WT (black) or the  
712 AA mt (green) (n=9). **(C)** Competition assay between WT (gray) and the AA mt (green) in Vero  
713 E6 and Calu-3 2b4 cells at a 1:1 input ratio and an MOI of 0.01 (n=6). **(D)** Full-length and  
714 subgenomic transcript levels 24 hours post infection from Calu-3 2b4 cells infected with WT or  
715 the AA mt. Transcripts were normalized to 18S ribosomal RNA and graphed as fold change in  
716 the AA mt relative to WT (n=3). **(E)** Whole cell lysates from Calu-3 2b4 cells infected with WT or  
717 the AA mt and analyzed by PA SDS-Page (top) and standard SDS-Page (bottom) followed by  
718 blotting with an N-specific antibody (n=3). **(F)** Viral titer 48 hours post infection from Calu-3 2b4  
719 cells infected with WT (gray) or the AA mt (green) at an MOI of 0.01. Cells were treated with the  
720 indicated concentrations of kenpaullone prior to and during infection (n=4). Graphs represent  
721 mean titer  $\pm$  s.d. Significance was determined by two-tailed student's t-test with  $p \leq 0.01$  (\*\*) and  
722  $p \leq 0.001$  (\*\*\*). Grey dotted lines are equal to LOD.

723

724

## Figures

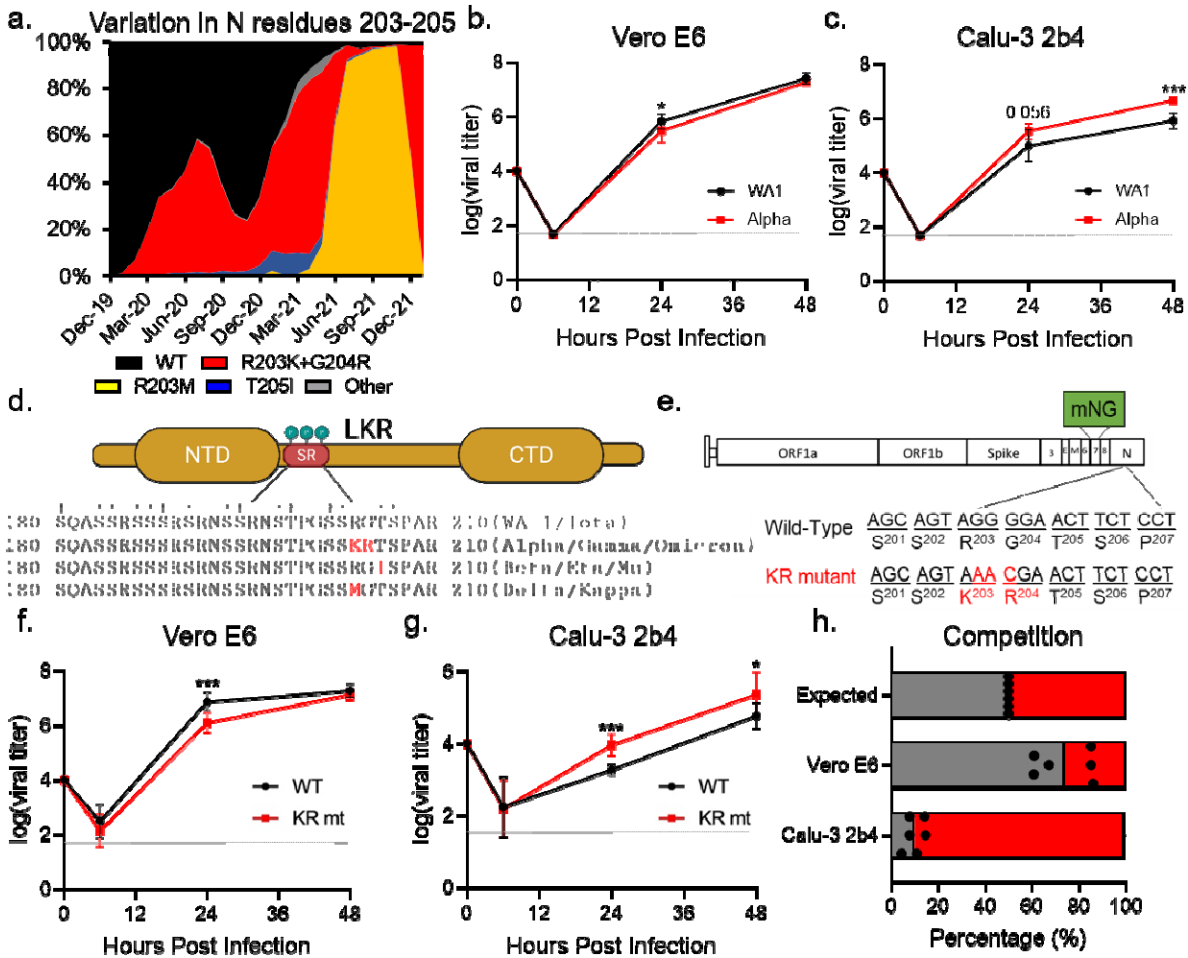

**Fig 1. The KR mt enhances SARS-CoV-2 replication.** (A) Amino acid frequencies for nucleocapsid residues 203-205 in SARS-CoV-2 sequences reported to the GISAID, binned by month of collection and graphed as percent of total sequences reported during that period. (B-C) Viral titer from Vero E6 (B) or Calu-3 2b4 cells (C) infected with WA-1 (black) or the alpha variant (red) at an MOI of 0.01 ( $n \geq 6$ ). (D). Schematic of the SR domain of SARS-CoV-2 nucleocapsid. Variable residues are displayed as red text within the sequence of their corresponding lineages. Phosphorylated residues are indicated by a †. (E) Schematic of the SARS-CoV-2 genome, showing the creation of the KR mutation and the replacement of ORF7 with the mNG reporter protein. (F-G) Viral titer of Vero E6 (F) or Calu-3 2b4 (G) cells infected with WT (black) or the KR mt (red) at a MOI of 0.01 ( $n=9$ ). (H) Competition assay between WT (gray) and KR mt (red) in Vero E6 or Calu-3 2b4 cells infected at a 1:1 input ratio with an MOI of 0.01 ( $n=6$ ). Titer data are the mean  $\pm$  s.d. For competition, individual replicates are graphed as points, while the mean percentage of each virus is displayed as a bar graph. Statistical significance was determined by two-tailed student's T-test with  $p \leq 0.05$  (\*),  $p \leq 0.01$  (\*\*), and  $p \leq 0.001$  (\*\*\*). Grey dotted lines are equal to LOD.

725  
726  
727  
728  
729  
730  
731  
732  
733  
734  
735  
736  
737

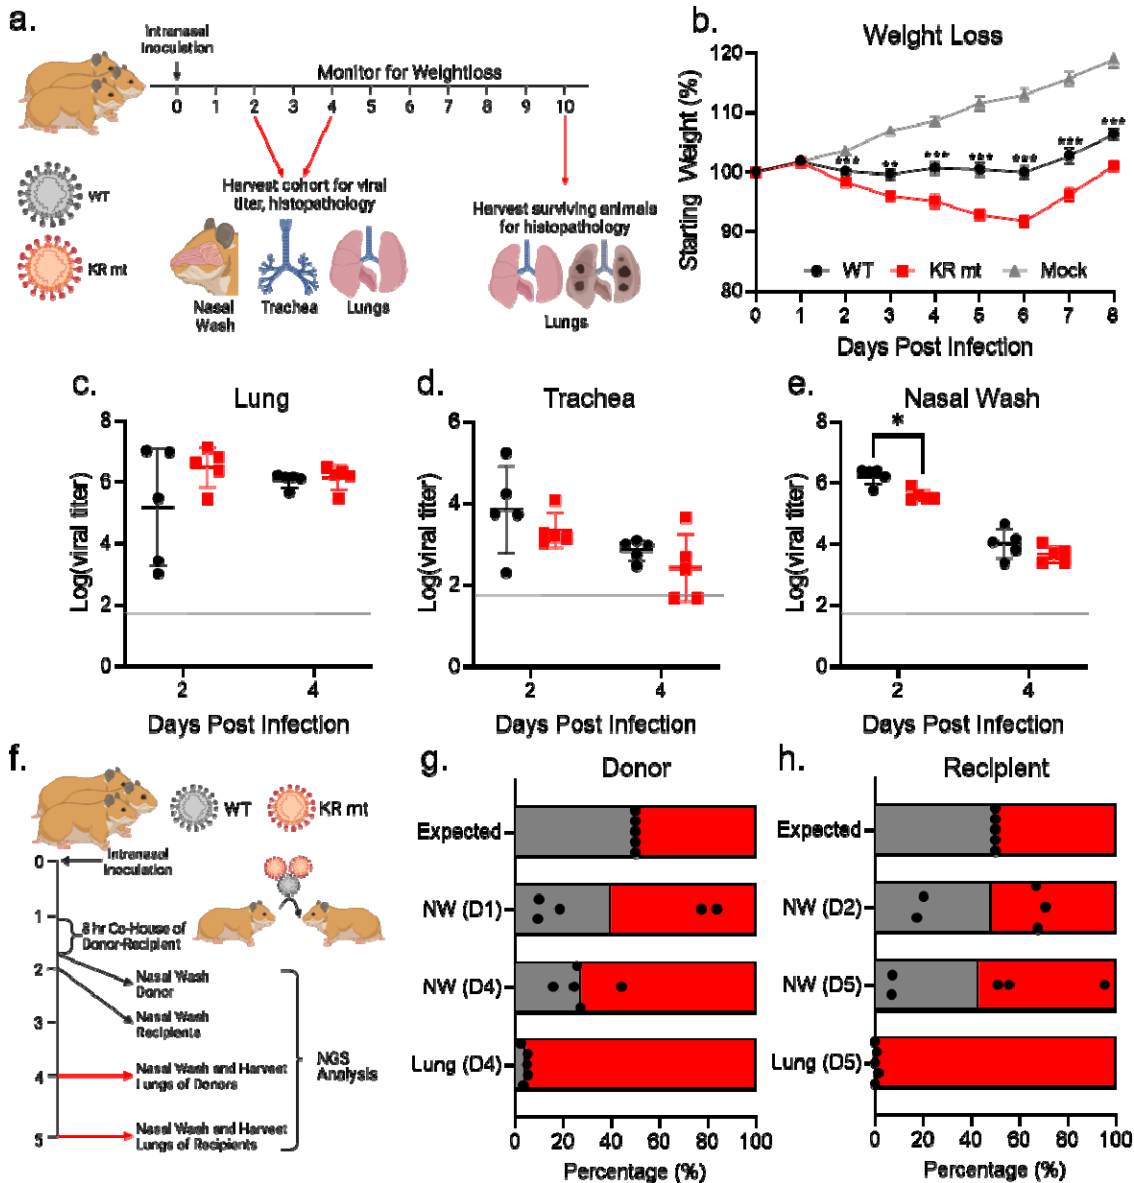

738

739 **Fig 2. The KR mt enhances SARS-CoV-2 pathogenesis and fitness.** (A) Schematic of the infection of hamsters  
 740 with SARS-CoV-2. (B-E) Three- to four-week-old male hamsters were mock-infected (gray) or inoculated with  $10^4$   
 741 PFU of WT SARS-CoV-2 (black) or the KR mt (red). Animals were then monitored for weight loss (B). On days 2 and  
 742 4 post infection, viral titers in the lung (C), trachea (D), and from nasal washes (E) were determined. (F) Schematic of  
 743 competition/transmission experiment. (G-H) Three- to four-week-old male donor hamsters were inoculated with  $10^4$   
 744 PFU of WT SARS-CoV-2 and the KR mt at a 1:1 ratio. On day 1 of the experiment, donor and recipient hamsters  
 745 were co-housed for 8 hours, then separated, and the donor hamsters underwent nasal washing. On day 2, recipient  
 746 hamsters were nasal washed. Hamsters were then monitored and nasal washes and lung tissue harvested on days 4  
 747 (donors) and 5 (recipients). The ratio of WT (gray) to KR mt (red) was then determined by NGS of all donor (G) and  
 748 recipient (H) samples. For weight loss data, mean percent weight loss was graphed  $\pm$  s.e.m. For titer data, individuals  
 749 were graphed with means  $\pm$  s.d. indicated by lines. For competition studies, individual replicates are graphed as  
 750 points, while bars represent the mean. Statistical significance was between WT and the KR mt was determined by  
 751 student's T-Test with  $p \leq 0.05$  (\*),  $p \leq 0.01$  (\*\*), and  $p \leq 0.001$  (\*\*\*). Grey dotted lines are equal to LOD.  
 752



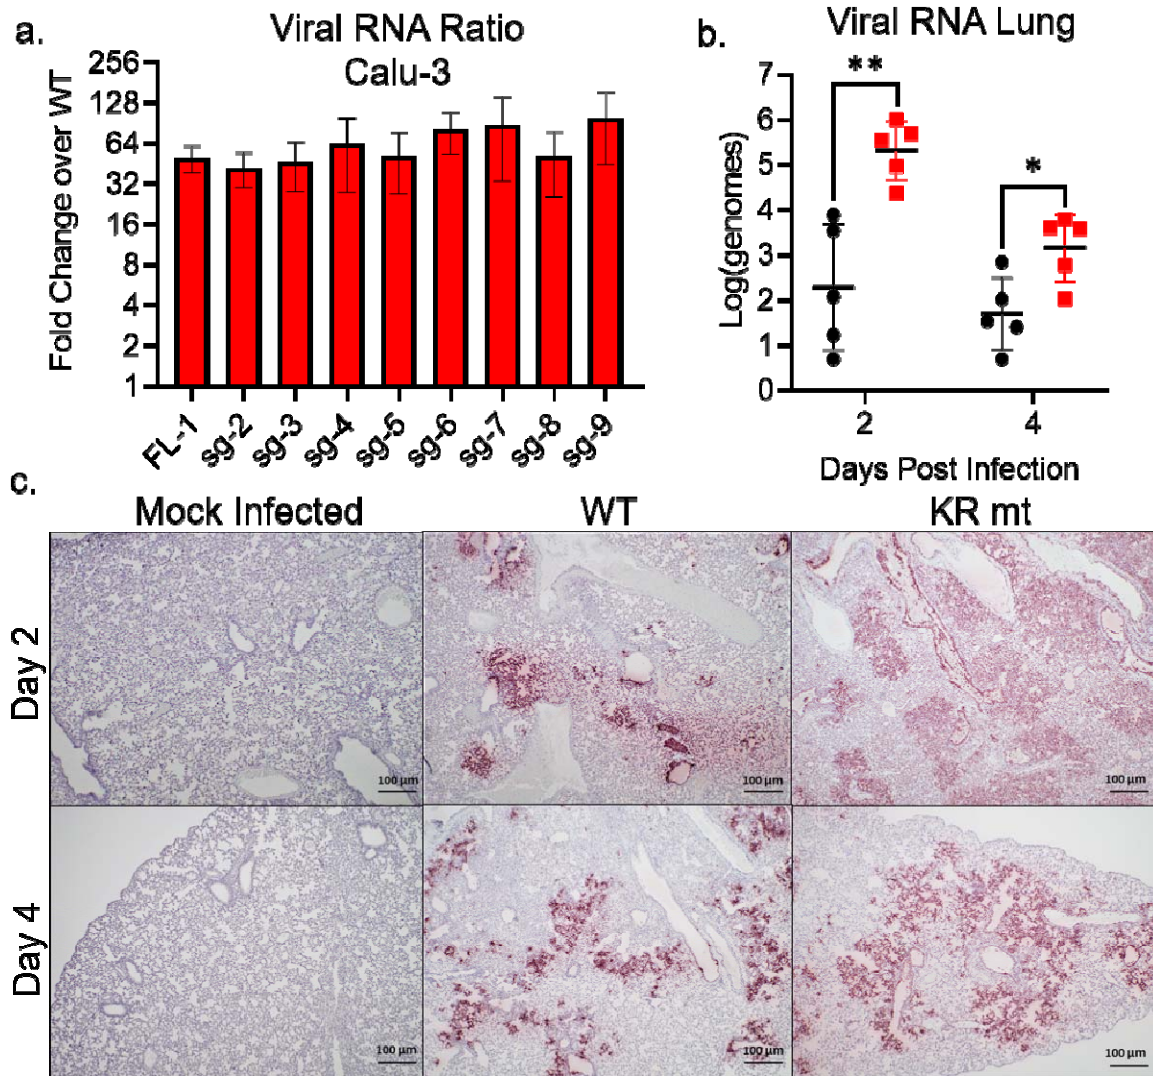

**Fig 3. The KR mt increases levels of viral RNA and antigen. (A)** Full-length and subgenomic transcript levels 24 hours post infection from Calu-3 2b4 cells infected at an MOI of 0.01 with WT SARS-CoV-2 or the KR mt (n=3). Transcript levels were normalized to 18S ribosomal RNA and graphed as the fold change in the KR mt relative to WT **(B-C)** Three- to four-week old male hamsters were inoculated with PBS (mock) or  $10^4$  PFU of WT or the KR mt. On days 2 and 4 post infection, lung tissue was harvested. The levels of full-length SARS-CoV-2 RNA in WT and KR mt infected animals (n=5) **(B)**. Representative SARS-CoV-2 antigen staining (anti-Nucleocapsid) of lung tissue from mock, WT, or KR mt infected animals (n=5) **(C)**. For *in vitro* transcripts, bars are mean titer  $\pm$  s.d. For *in vivo* RNA, individual replicates are graphed with means  $\pm$  s.d. indicated by lines. Significance was determined by student's T-Test with  $p \leq 0.05$  (\*) and  $p \leq 0.01$  (\*\*).

753  
754  
755  
756  
757  
758  
759  
760  
761  
762  
763  
764  
765

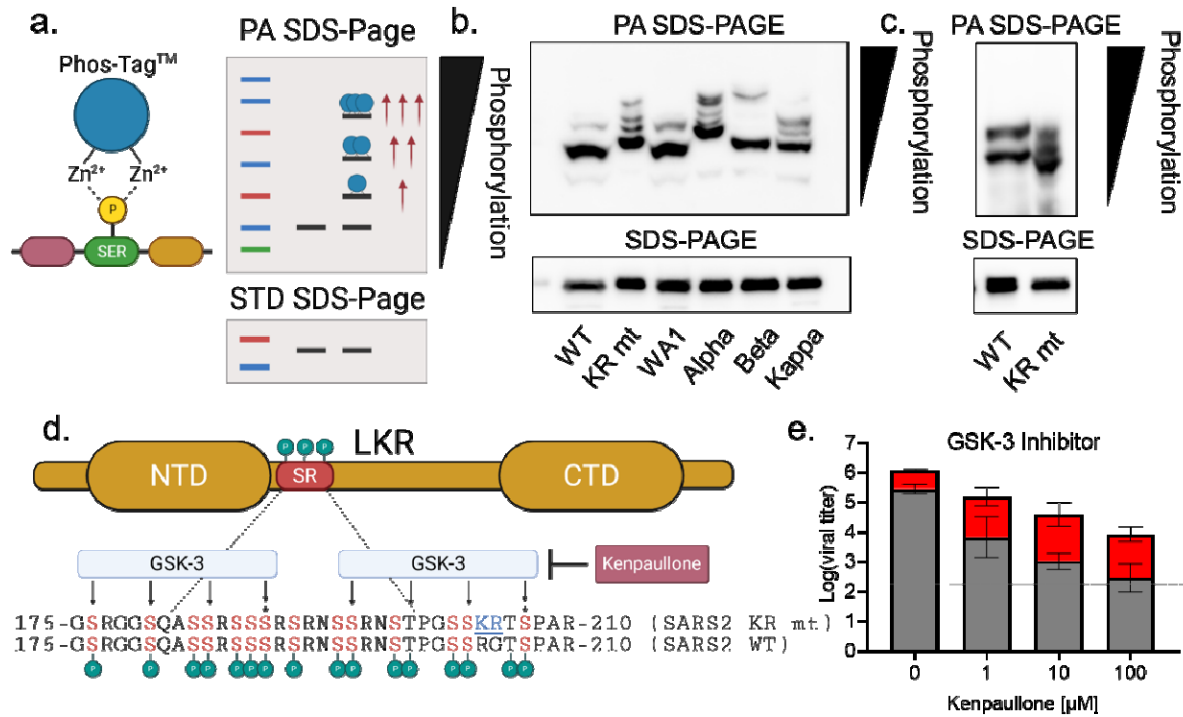

**Fig 4. The KR mt increases N phosphorylation to enhance infection.** (A) Schematic of phosphate-affinity (PA) SDS-PAGE. (B) Whole cell lysates from Calu-3 2b4 cells infected with SARS-CoV-2 WA-1-mNG (WT), the KR mt, WA-1, alpha, beta, and kappa variants were analyzed by PA SDS-Page (top) or standard SDS-PAGE (bottom) followed by blotting with an N-specific antibody (n=3). (C) Whole cell lysates from Vero E6 cells infected with WT or the KR mt and analyzed by PA-SDS-Page (top) or standard SDS-Page (bottom) followed by blotting with an N-specific antibody (n=3). (D) Schematic of phosphorylation by GSK-3 of the SR domain of SARS-CoV-2 N. Residues targeted by GSK-3 are indicated with arrows and priming residues designated by a '\*'. (E) Viral titer 48 hours post infection from Calu-3 2b4 cells infected with WT SARS-CoV-2 (gray) or the KR mt (red) at an MOI of 0.01. Cells were treated with the indicated concentrations of kenpaullone prior to and during infection. Bars are the mean titer ± s.d. (n=4). Significance indicates a change in mean titer difference and was determined by student's T-Test with p≤0.05 (\*) and p≤0.01 (\*\*).

766  
767  
768  
769  
770  
771  
772  
773  
774  
775  
776  
777

778

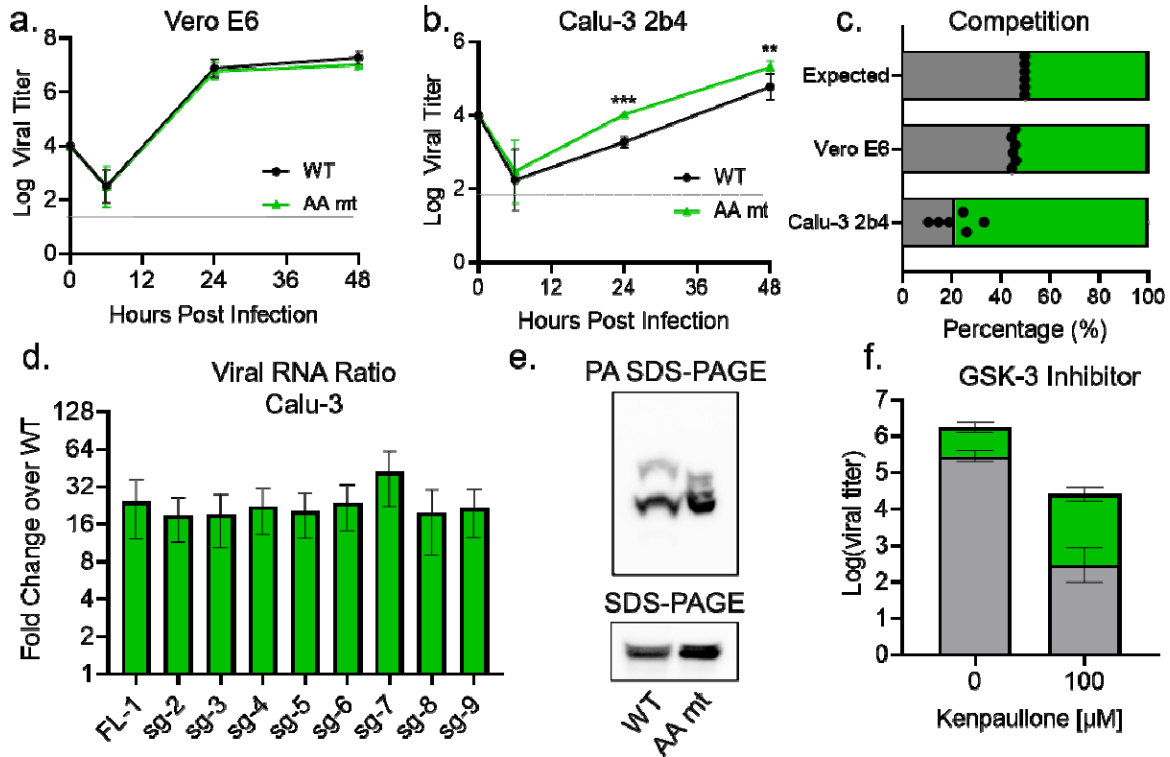

779 **Fig 5. The AA mt mimics the KR mt's enhancement of SARS-CoV-2 infection.** (A-B). Viral titer from Vero E6 (A) or Calu-3 2b4  
 780 (B) cells infected at an MOI of 0.01 with WT (black) or the AA mt (green) (n=9). (C) Competition assay between WT (gray) and the  
 781 AA mt (green) in Vero E6 and Calu-3 2b4 cells at a 1:1 input ratio and an MOI of 0.01 (n=6). (D) Full-length and subgenomic  
 782 transcript levels 24 hours post infection from Calu-3 2b4 cells infected with WT or the AA mt. Transcripts were normalized to 18S  
 783 ribosomal RNA and graphed as fold change in the AA mt relative to WT (n=3). (E) Whole cell lysates from Calu-3 2b4 cells infected  
 784 with WT or the AA mt and analyzed by PA SDS-Page (top) and standard SDS-Page (bottom) followed by blotting with an N-specific  
 785 antibody (n=3). (F) Viral titer 48 hours post infection from Calu-3 2b4 cells infected with WT (gray) or the AA mt (green) at an MOI of  
 786 0.01. Cells were treated with the indicated concentrations of kenpaulone prior to and during infection (n=4). Graphs represent mean  
 787 titer ± s.d. Significance was determined by two-tailed student's t-test with p<0.01 (\*\*) and p< 0.001 (\*\*\*). Grey dotted lines are equal  
 788 to LOD.

789

790

791  
792

## Supporting Information

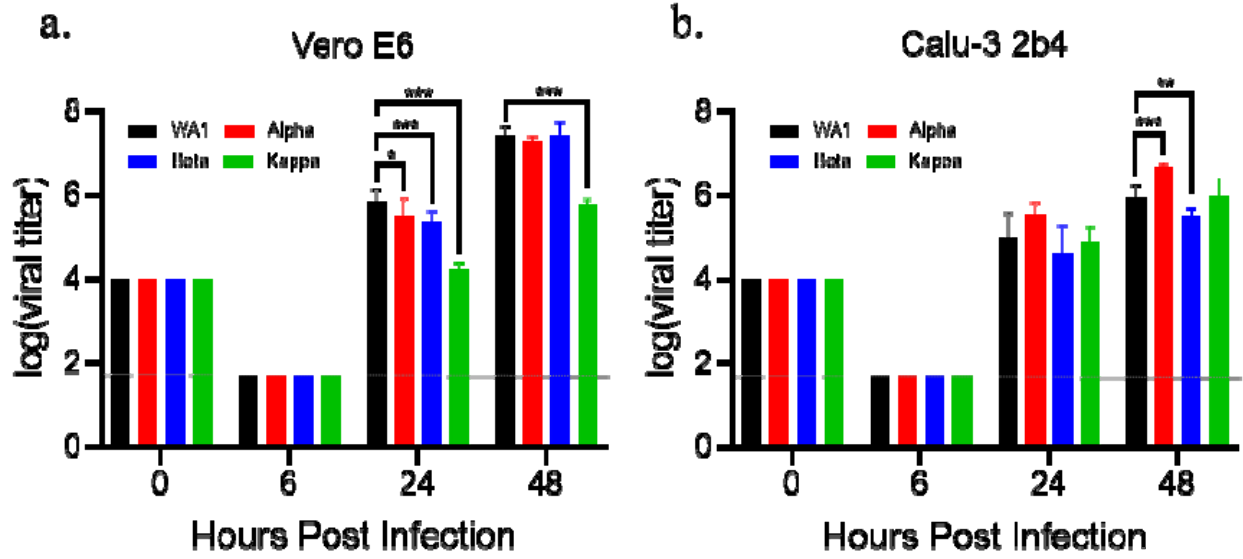

793

794 **S1 Fig. Replication of SARS-CoV-2 variants.** Viral titer from Vero E6 (A) or Calu-3 2b4 cells (B) inoculated with  
795 SARS-CoV-2 WA-1 (black) or the alpha (red), beta (blue) or kappa (green) variants at a MOI of 0.01. Graphed data  
796 represent the mean  $\pm$  s.d. Statistical significance was determined by two-tailed student's T-test with  $p \leq 0.05$  (\*),  
797  $p \leq 0.01$  (\*\*), and  $p \leq 0.001$  (\*\*\*). Grey dotted lines are equal to LOD.  
798

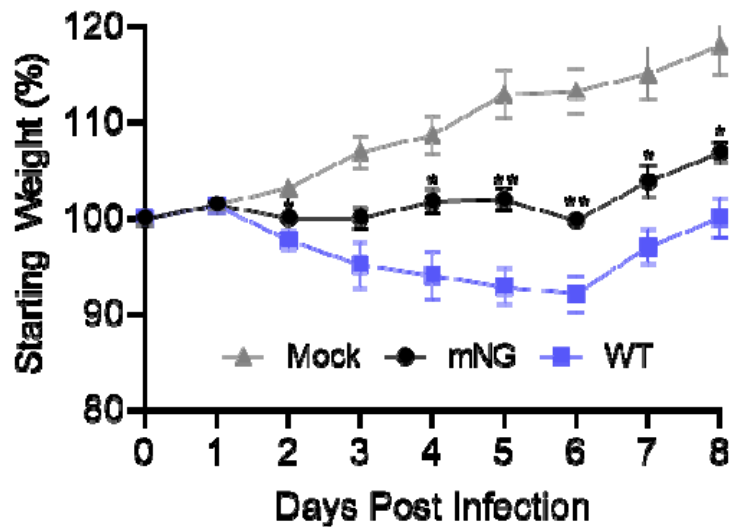

799  
800  
801  
802  
803  
804

**S2 Fig. *In vivo* attenuation of the SARS-CoV-2 mNeonGreen reporter virus.** Three- to four-week-old Golden Syrian hamsters were intranasally inoculated with PBS alone (gray) or  $10^4$  PFU of WA-1 SARS-CoV-2 (blue) or mNG SARS-CoV-2 (black). Graphed data represent the mean weight loss  $\pm$  s.e.m ( $n \geq 5$ ). Statistical significance between WT and mNG determined by two-tailed students T-test with  $p \leq 0.05$  (\*) and  $p \leq 0.01$  (\*\*).

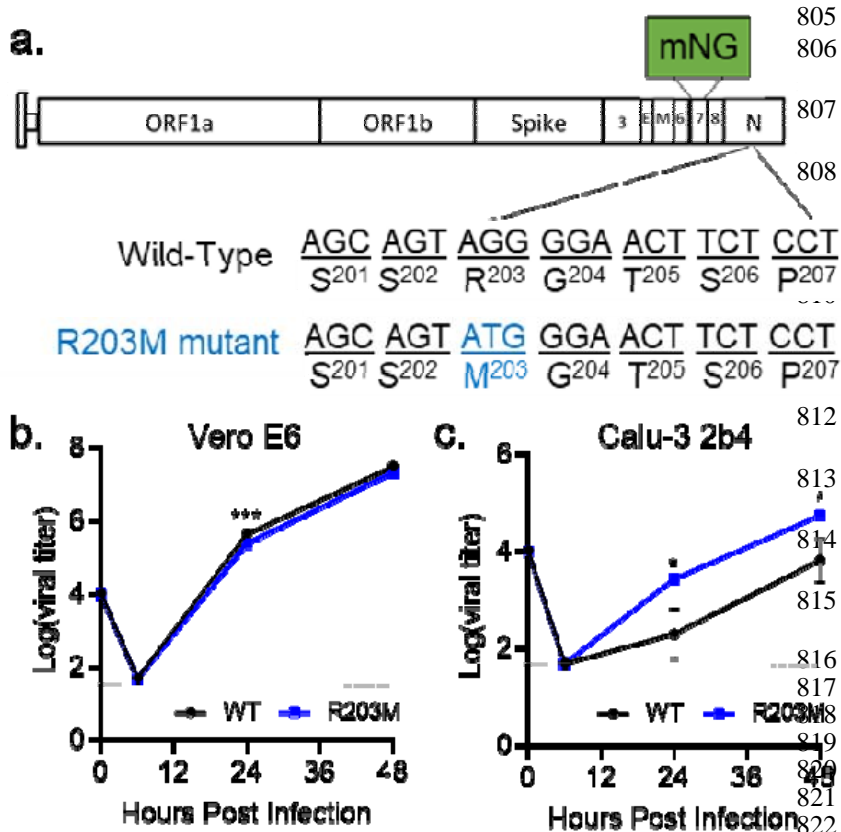

824  
825  
826  
827  
828  
829

**S3 Fig. The R203M mutation enhances SARS-CoV-2 replication.** (A) Schematic of the SARS-CoV-2 genome, showing the creation of the R203M mutation and the replacement of ORF7 with the mNG reporter protein. (B-C) Viral titers from Vero E6 (B) or Calu-3 2b4 (C) infected with WT or R203M SARS-CoV-2 at an MOI of 0.01. Graphed data represent mean  $\pm$  s.d. (n=3). Statistical significance was determined by two-tailed student's T-test with  $p \leq 0.05$  (\*) and  $p \leq 0.001$  (\*\*). Grey dotted lines are equal to LOD.

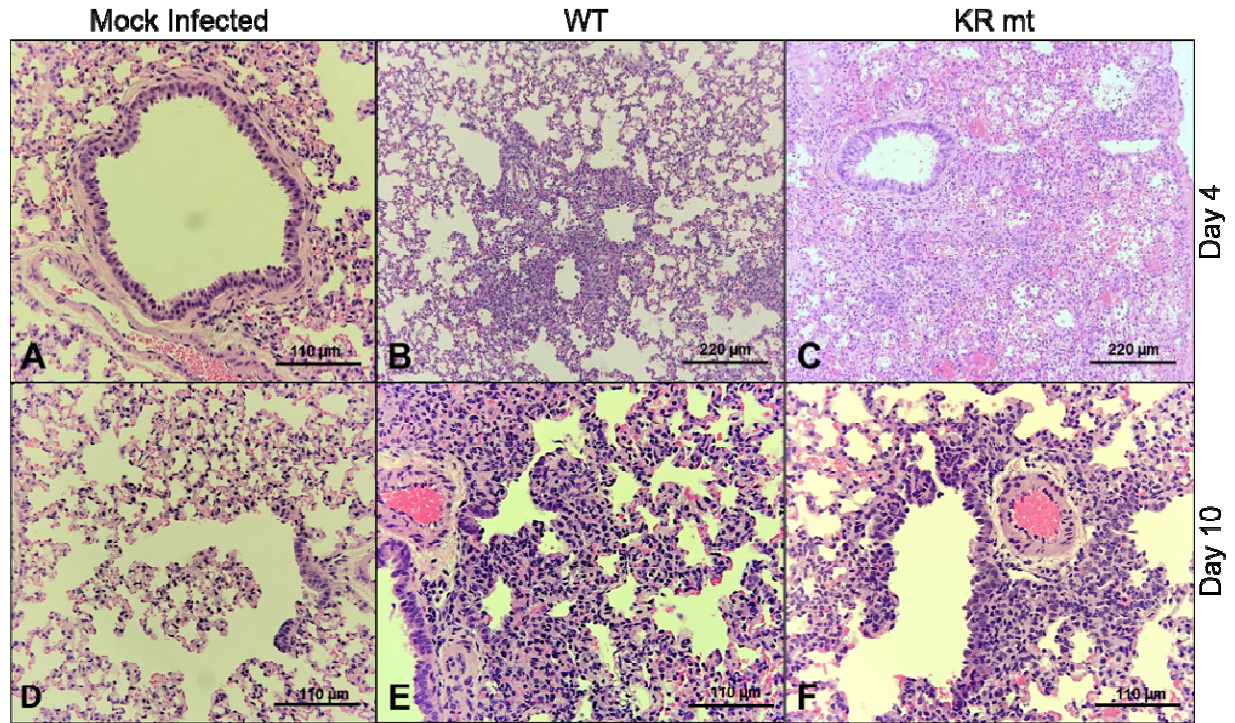

830  
831  
832 **S4 Fig. Lung histopathology in hamsters infected with WT and KR mt SARS-CoV-2.** Lung tissue was harvested,  
833 fixed, and 5  $\mu\text{m}$  sections cut from mock, WT SARS-CoV-2, or KR mt-infected hamsters and stained with hematoxylin  
834 and eosin. (A) Normal bronchus, pulmonary artery, and alveoli in mock infection on day 4 (20X). (B) Bronchiolitis,  
835 peribronchiolitis, interstitial pneumonia, and edema surrounding branch of the pulmonary artery at day 4 in hamsters  
836 infected with WT virus (10X). (C) Severe bronchiolar cytopathic effect, interstitial pneumonia, cytopathic alveolar  
837 pneumocytes, alveoli containing mononuclear cells and red blood cells at day 4 in hamsters infected with KR mt. This  
838 lesion extended over numerous fields (10X). (D) Normal respiratory bronchiole, alveolar ducts, and alveolar sacs in  
839 mock infection on day 10 (20X). (E) Interstitial pneumonia adjacent to a bronchus at day 10 in hamsters infected with  
840 WT (20X). (F) Bronchiolar epithelial cytopathic effect, peribronchiolitis, focal interstitial pneumonia, branch of  
841 pulmonary artery with surrounding edema and mononuclear cell infiltration of endothelium at day 10 in a hamster  
842 infected with the KR mt (20X). Shown are representative images typical of data gathered from 5 animals from each  
843 group.

844

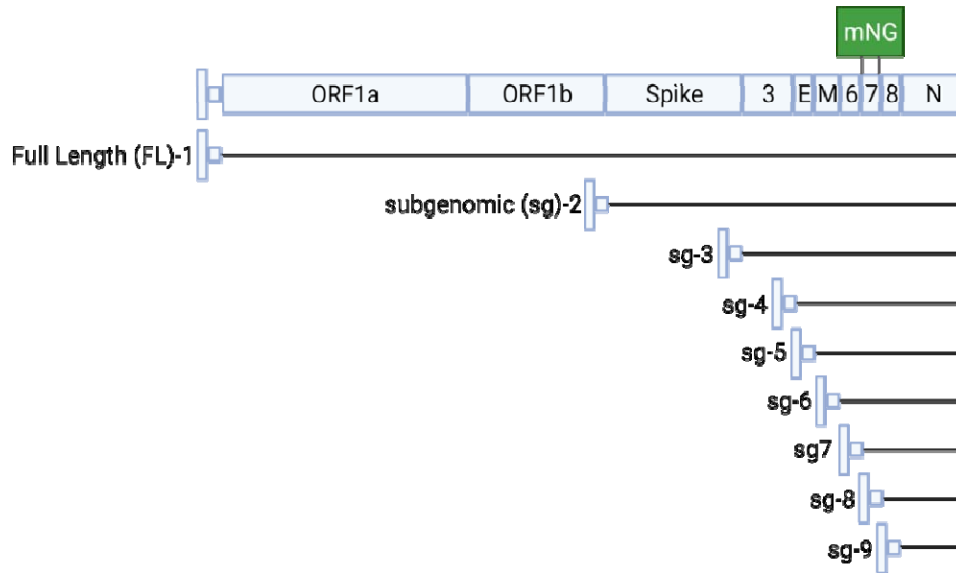

845

846

847

848

849

**S5 Fig. Schematic of SARS-CoV-2 RNAs.** Illustration of full length (FL) and subgenomic (sg) RNAs produced during SARS-CoV-2 infection.



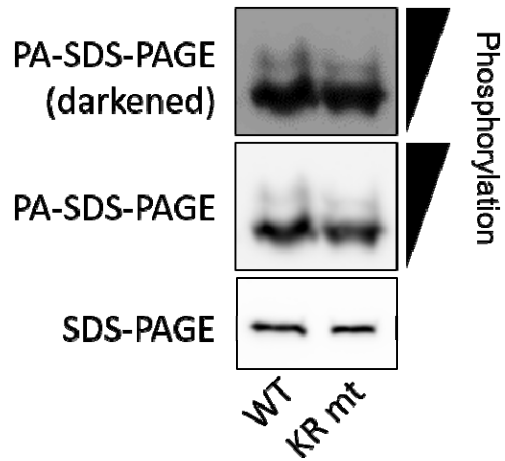

850  
851  
852  
853  
854

**S6 Fig. The KR mt has no effect on phosphorylation in virions.** Calu-3 2b4 cells were infected at an MOI of 0.01 with WT or KR mt SARS-CoV-2. Forty-eight hours post infection, viral supernatants were taken. Virions were then purified from supernatants by ultracentrifugation on a 20% sucrose cushion, inactivated, and N levels analyzed by both phospho-affinity and standard SDS-Page. Results are representative of two independent experiments.

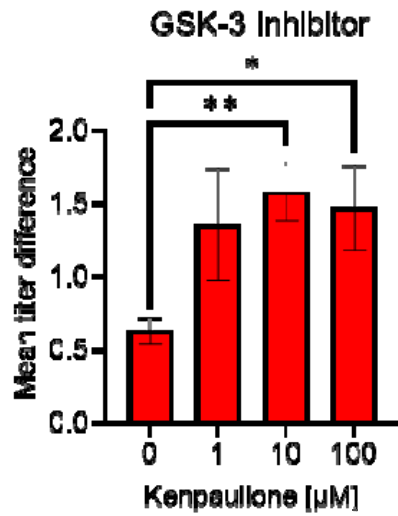

855

856

857

858

859

860

**S7 Fig. Mean titer differences between WT and KR mutant during GSK-3 inhibition.** Mean difference in viral titer between WT SARS-CoV-2 and the KR mutant when treated with kenpauillone at the indicated concentrations (n=4). Error bars are  $\pm$  s.e.m. Significance by student T-test with  $p \leq 0.05$  (\*) and  $p \leq 0.01$  (\*\*).

861

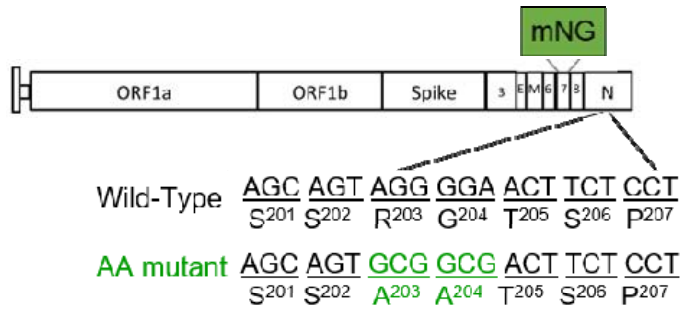

862

863

864

865

**S8 Fig. Schematic representation of the AA mt.** Schematic shows the creation of the AA mutation within the SARS-CoV-2 genome and the replacement of ORF7 with the mNeonGreen reporter.

866

a. # Of Sequences

| Collection Period | Total # of Sequences | Wild Type | R203M   | R203K+G204R | T205I  | Other  |
|-------------------|----------------------|-----------|---------|-------------|--------|--------|
| Dec-19            | 24                   | 24        | 0       | 0           | 0      | 0      |
| Jan-20            | 636                  | 627       | 0       | 5           | 4      | 0      |
| Feb-20            | 1,776                | 1,654     | 0       | 118         | 4      | 0      |
| Mar-20            | 51,789               | 41,743    | 34      | 9,849       | 110    | 53     |
| Apr-20            | 52,515               | 34,698    | 17      | 17,492      | 225    | 83     |
| May-20            | 26,722               | 16,797    | 12      | 9,478       | 365    | 70     |
| Jun-20            | 30,279               | 16,755    | 13      | 12,992      | 438    | 81     |
| Jul-20            | 33,232               | 13,702    | 51      | 18,630      | 574    | 175    |
| Aug-20            | 37,256               | 16,805    | 28      | 19,578      | 484    | 301    |
| Sep-20            | 39,886               | 24,574    | 20      | 14,203      | 871    | 218    |
| Oct-20            | 65,901               | 48,270    | 18      | 16,184      | 1,117  | 312    |
| Nov-20            | 95,020               | 72,554    | 53      | 19,843      | 2,262  | 458    |
| Dec-20            | 130,225              | 86,181    | 67      | 37,771      | 5,709  | 497    |
| Jan-21            | 231,857              | 124,432   | 5,180   | 132,295     | 19,616 | 0      |
| Feb-21            | 253,458              | 86,343    | 650     | 135,877     | 23,757 | 6,831  |
| Mar-21            | 400,236              | 71,259    | 3,225   | 269,755     | 36,535 | 9,458  |
| Apr-21            | 395,799              | 47,657    | 12,634  | 291,466     | 25,294 | 8,748  |
| May-21            | 290,394              | 22,032    | 39,441  | 200,985     | 11,291 | 16,641 |
| Jun-21            | 217,989              | 9,358     | 137,295 | 64,233      | 5,220  | 1,882  |
| Jul-21            | 193,146              | 3,828     | 178,242 | 11,290      | 1,786  | 0      |
| Aug-21            | 845,586              | 26,686    | 797,037 | 17,209      | 4,308  | 346    |
| Sep-21            | 693,944              | 15,524    | 674,257 | 3,613       | 1,986  | 564    |
| Oct-21            | 649,702              | 15,444    | 631,301 | 1,216       | 1,294  | 446    |
| Nov-21            | 784,122              | 11,516    | 767,155 | 3,336       | 1,285  | 810    |
| Dec-21            | 918,035              | 17,155    | 905,448 | 392,943     | 1,214  | 1,375  |
| Jan-22            | 807,414              | 15,544    | 34,728  | 756,328     | 123    | 691    |

b. % Of Sequences

| Collection Period | Total # of Sequences | Wild Type | R203M | R203K+G204R | T205I | Other |
|-------------------|----------------------|-----------|-------|-------------|-------|-------|
| Dec-19            | N/A                  | 100.00    | 0.00  | 0.00        | 0.00  | 0.00  |
| Jan-20            | N/A                  | 98.58     | 0.00  | 0.79        | 0.63  | 0.00  |
| Feb-20            | N/A                  | 93.13     | 0.00  | 6.64        | 0.23  | 0.00  |
| Mar-20            | N/A                  | 80.60     | 0.07  | 19.02       | 0.21  | 0.10  |
| Apr-20            | N/A                  | 66.07     | 0.03  | 33.31       | 0.43  | 0.16  |
| May-20            | N/A                  | 62.86     | 0.04  | 35.47       | 1.37  | 0.26  |
| Jun-20            | N/A                  | 55.34     | 0.04  | 42.91       | 1.45  | 0.27  |
| Jul-20            | N/A                  | 41.36     | 0.15  | 56.23       | 1.73  | 0.53  |
| Aug-20            | N/A                  | 45.18     | 0.08  | 52.63       | 1.30  | 0.81  |
| Sep-20            | N/A                  | 61.61     | 0.05  | 35.61       | 2.18  | 0.55  |
| Oct-20            | N/A                  | 73.25     | 0.03  | 24.56       | 1.69  | 0.47  |
| Nov-20            | N/A                  | 76.32     | 0.06  | 20.87       | 2.27  | 0.48  |
| Dec-20            | N/A                  | 66.18     | 0.05  | 29.00       | 4.38  | 0.38  |
| Jan-21            | N/A                  | 45.04     | 2.36  | 44.12       | 8.47  | 0.00  |
| Feb-21            | N/A                  | 34.07     | 0.26  | 55.61       | 9.37  | 2.70  |
| Mar-21            | N/A                  | 17.80     | 0.81  | 67.40       | 9.13  | 4.86  |
| Apr-21            | N/A                  | 12.04     | 3.19  | 75.64       | 6.39  | 4.74  |
| May-21            | N/A                  | 7.59      | 13.58 | 69.21       | 3.89  | 5.73  |
| Jun-21            | N/A                  | 4.29      | 62.98 | 29.47       | 2.39  | 0.86  |
| Jul-21            | N/A                  | 1.96      | 91.34 | 5.79        | 0.92  | 0.00  |
| Aug-21            | N/A                  | 3.16      | 94.25 | 2.04        | 0.51  | 0.04  |
| Sep-21            | N/A                  | 2.23      | 96.88 | 0.52        | 0.29  | 0.08  |
| Oct-21            | N/A                  | 2.38      | 97.17 | 0.19        | 0.20  | 0.07  |
| Nov-21            | N/A                  | 1.47      | 97.84 | 0.43        | 0.16  | 0.10  |
| Dec-21            | N/A                  | 1.87      | 55.05 | 42.80       | 0.12  | 0.15  |
| Jan-22            | N/A                  | 1.93      | 4.30  | 93.67       | 0.02  | 0.09  |

867  
868  
869  
870  
871

**S1 Table. Frequency of mutations in residues 203-205 in SARS-CoV-2 nucleocapsid. (A-B)** Frequency of WT, R203M, R203K+G204R, T205I, or all other genotypes binned by month of collection, represented as the raw totals (A) or as a percentage of total sequences in a given month (B)..
